# Supplementary material for: Independent and combined associations between multiple lifestyle behaviours and academic grades of inner urban and peri-urban high school students: a cross-sectional study in Chongqing, China
Source: PubMed Central journal article supplement — BMJ Open. 2021 Nov 26;11(11):e049508. doi: 10.1136/bmjopen-2021-049508 (PMC8628331; doi:10.1136/bmjopen-2021-049508), 2021-11-26
Supplement: bmjopen-2021-049508.draft_revisions.pdf [file bmjopen-2021-049508.draft_revisions.pdf]

# BMJ Open

BMJ Open is committed to open peer review. As part of this commitment we make the peer review history of every article we publish publicly available.

When an article is published we post the peer reviewers' comments and the authors' responses online. We also post the versions of the paper that were used during peer review. These are the versions that the peer review comments apply to.

The versions of the paper that follow are the versions that were submitted during the peer review process. They are not the versions of record or the final published versions. They should not be cited or distributed as the published version of this manuscript.

BMJ Open is an open access journal and the full, final, typeset and author-corrected version of record of the manuscript is available on our site with no access controls, subscription charges or pay-per-view fees (<http://bmjopen.bmj.com>).

If you have any questions on BMJ Open's open peer review process please email [info.bmjopen@bmj.com](mailto:info.bmjopen@bmj.com)

# BMJ Open

## Independent and Combined Effects of Lifestyle Behaviors on Academic Grades of Inner Urban and Peri-Urban High School Students: A Cross-Sectional Study in Chongqing, China

|                               |                                                                                                                                                                                                                                                                                                                                                                                                                                                                                                                                                                                                                                                                            |
|-------------------------------|----------------------------------------------------------------------------------------------------------------------------------------------------------------------------------------------------------------------------------------------------------------------------------------------------------------------------------------------------------------------------------------------------------------------------------------------------------------------------------------------------------------------------------------------------------------------------------------------------------------------------------------------------------------------------|
| Journal:                      | <i>BMJ Open</i>                                                                                                                                                                                                                                                                                                                                                                                                                                                                                                                                                                                                                                                            |
| Manuscript ID                 | bmjopen-2021-049508                                                                                                                                                                                                                                                                                                                                                                                                                                                                                                                                                                                                                                                        |
| Article Type:                 | Original research                                                                                                                                                                                                                                                                                                                                                                                                                                                                                                                                                                                                                                                          |
| Date Submitted by the Author: | 27-Jan-2021                                                                                                                                                                                                                                                                                                                                                                                                                                                                                                                                                                                                                                                                |
| Complete List of Authors:     | Cai, Zhengjie; Chongqing Medical University, School of Public Health and Management<br>Xian, Jin Li; Chongqing Medical University, School of Public Health and Management<br>Araujo, Camila; Loma Linda University School of Medicine, Department of Physiology and Pharmacology<br>Zhang, Ziwei; Chongqing Medical University, The Second Clinical College<br>Zhou, Hongyu; Chongqing Medical University, School of Public Health and Management<br>Peng, Huan; Chongqing Medical University, School of Public Health and Management<br>Sharma, Manoj; University of Nevada Las Vegas<br>Zhao, Yong; Chongqing Medical University, School of public health and management |
| Keywords:                     | Community child health < PAEDIATRICS, PUBLIC HEALTH, SOCIAL MEDICINE                                                                                                                                                                                                                                                                                                                                                                                                                                                                                                                                                                                                       |
|                               |                                                                                                                                                                                                                                                                                                                                                                                                                                                                                                                                                                                                                                                                            |

SCHOLARONE™  
Manuscripts

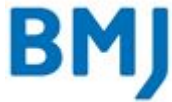

I, the Submitting Author has the right to grant and does grant on behalf of all authors of the Work (as defined in the below author licence), an exclusive licence and/or a non-exclusive licence for contributions from authors who are: i) UK Crown employees; ii) where BMJ has agreed a CC-BY licence shall apply, and/or iii) in accordance with the terms applicable for US Federal Government officers or employees acting as part of their official duties; on a worldwide, perpetual, irrevocable, royalty-free basis to BMJ Publishing Group Ltd ("BMJ") its licensees and where the relevant Journal is co-owned by BMJ to the co-owners of the Journal, to publish the Work in this journal and any other BMJ products and to exploit all rights, as set out in our [licence](#).

The Submitting Author accepts and understands that any supply made under these terms is made by BMJ to the Submitting Author unless you are acting as an employee on behalf of your employer or a postgraduate student of an affiliated institution which is paying any applicable article publishing charge ("APC") for Open Access articles. Where the Submitting Author wishes to make the Work available on an Open Access basis (and intends to pay the relevant APC), the terms of reuse of such Open Access shall be governed by a Creative Commons licence – details of these licences and which [Creative Commons](#) licence will apply to this Work are set out in our licence referred to above.

Other than as permitted in any relevant BMJ Author's Self Archiving Policies, I confirm this Work has not been accepted for publication elsewhere, is not being considered for publication elsewhere and does not duplicate material already published. I confirm all authors consent to publication of this Work and authorise the granting of this licence.

1  
2  
3  
4 **1 Independent and Combined Effects of Lifestyle Behaviors on Academic Grades**  
5  
6 **2 of Inner Urban and Peri-Urban High School Students: A Cross-Sectional Study**  
7  
8  
9 **3 in Chongqing, China**

11 4 Zhengjie Cai<sup>1,2,3</sup>, Jinli Xian<sup>1,2,3</sup>, Camila Araujo<sup>4</sup>, Ziwei Zhang<sup>5</sup>, Hongyu Zhou<sup>1</sup>, Huan Peng<sup>1</sup>,  
13  
14 5 Manoj Sharma<sup>6</sup>, Yong Zhao<sup>1,2,3,7\*</sup>

16  
17 6 <sup>1</sup>School of Public Health and Management, Chongqing Medical University, Chongqing, China

18  
19 7 <sup>2</sup>Research Center for Medicine and Social Development, Chongqing Medical University,  
20  
21  
22 8 Chongqing, China

23  
24  
25 9 <sup>3</sup>The Innovation Center for Social Risk Governance in Health, Chongqing Medical University,  
26  
27 10 Chongqing, China

28  
29  
30 11 <sup>4</sup>Department of Physiology and Pharmacology, Loma Linda University School of Medicine, Loma  
31  
32 12 Linda, California, USA

33  
34  
35 13 <sup>5</sup>The Second Clinical College, Chongqing Medical University, Chongqing, China

36  
37  
38 14 <sup>6</sup>Environmental & Occupational Health, School of Public Health, University of Nevada, Las  
39  
40 15 Vegas, USA

41  
42  
43 16 <sup>7</sup>Chongqing Key Laboratory of Child Nutrition and Health, Chongqing, China

44  
45 17 \* Correspondence: Yong Zhao; [zhaoyong@cqmu.edu.cn](mailto:zhaoyong@cqmu.edu.cn)

46  
47  
48 18

49  
50 19

51  
52 20

53  
54  
55 21

56  
57  
58 22

1  
2  
3  
4 23 **Abstract**

5  
6 24 **Objectives** Limited studies reported the associations between multiple lifestyle factors and  
7  
8  
9 25 academic grades. This study aims to assess the independent and combined effects of multiple  
10  
11 26 lifestyle behaviors on academic grades of inner urban high school students (IUHSSs) and  
12  
13  
14 27 peri-urban high school students (PUHSSs).

15  
16  
17 28 **Design** A cross-sectional study.

18  
19 29 **Participants** 1,481 high school students (49.9% boys) were included, who were enrolled from one  
20  
21  
22 30 inner urban and two peri-urban districts in Chongqing, China.

23  
24 31 **Outcome measures** Academic grades were assessed based on the students' self-reports of grade  
25  
26  
27 32 ranking on the last cumulative examination in their grade.

28  
29 33 **Results:** In IUHSSs and PUHSSs, high frequency of sugar-sweetened beverage consumption was  
30  
31  
32 34 unlikely to obtain high academic grades (OR, 0.56 [95% CI 0.32–0.99] and 0.63 [0.41–0.95],  
33  
34  
35 35 respectively). Among IUHSSs, meeting the recommendations for weekdays' screen time and egg  
36  
37 36 consumption (1.57 [1.06–2.34] and 1.60 [1.04–2.47], respectively), and high frequency of fruit  
38  
39 37 consumption (1.67 [1.11–2.50]) were significantly associated with high academic grades; meeting  
40  
41 38 the recommendation for weekdays' sleep duration was unlikely to obtain high academic grades  
42  
43 39 (0.46 [0.21–0.98]). Among PUHSSs, meeting the recommendations for weekends' sleep duration  
44  
45 40 (1.40 [1.02–1.93]) and regularly eating dinner (1.55 [1.01–2.37]) had significant association with  
46  
47 41 high academic grades. No significant differences were found between physical activity and  
48  
49 42 academic grades in IUHSSs and PUHSSs ( $p > 0.05$ ). Moreover, IUHSSs with 9–13 healthy  
50  
51 43 lifestyle behaviors were 3.25 times more likely to achieve high academic grades than IUHSSs  
52  
53 44 with six or less healthy lifestyle behaviors (3.25 [1.96–5.40]). No significant differences were  
54  
55  
56  
57  
58  
59  
60

1  
2  
3  
4 45 found in the combined effects of multiple lifestyle behaviors on the academic grades among  
5  
6  
7 46 PUHSSs ( $p > 0.05$ ).

8  
9 47 **Conclusions:** Correlations were observed between lifestyle behaviors of high school students and  
10  
11  
12 48 academic grades, and cumulative effects of healthy lifestyle behaviors have a stronger association  
13  
14  
15 49 with academic outcomes than the independent effects. These findings are particularly applicable to  
16  
17 50 IUHSSs.

18  
19  
20 51 **Keywords:** Lifestyle behaviors, Physical activity, Sleep duration, Screen time, Dietary behaviors,  
21  
22  
23 52 Academic grades, High school students, School health

### 24 25 26 27 53 **Strengths and limitations of this study**

- 28  
29 54 ➤ We provide the evidence of relationship between such a wide range of health behaviors and  
30  
31  
32 55 academic grades in high school students.
- 33  
34 56 ➤ Study participants represent inner urban and peri-urban population, results in this study could  
35  
36  
37 57 be generalizable to other settings with economic disparities.
- 38  
39 58 ➤ All the data were self-reported.
- 40  
41  
42 59 ➤ The cross-sectional design in this study does not allow for causal inference.
- 43  
44  
45  
46  
47  
48  
49  
50  
51  
52  
53  
54  
55  
56  
57  
58  
59  
60

1  
2  
3 724 73 **INTRODUCTION**

5  
6 74 High school is a key stage in the students' transition to college, their academic grades are closely  
7  
8  
9 75 related to college or university admission, even future careers and health in adulthood.<sup>1</sup> A better  
10  
11 76 understanding of modifiable factors affecting high school students' academic grades is important  
12  
13  
14 77 for public health research and school principals or management bodies in the high school settings.

15  
16  
17 78 Healthy dietary behaviors, sufficient physical activity and sleep, and minimal screen time  
18  
19 79 contribute to a healthy lifestyle that might be associated with students' high academic  
20  
21  
22 80 performance.<sup>2, 3</sup> Studies examining the associations between dietary behaviors and academic  
23  
24  
25 81 achievement have typically focused on micronutrient intake,<sup>4</sup> dietary intake,<sup>5</sup> and breakfast  
26  
27 82 consumption.<sup>2, 6</sup> Certain micronutrients (such as iron), high frequency of fruit and vegetable  
28  
29  
30 83 consumption, low consumption of energy-dense and nutrient-poor food, and regular breakfast  
31  
32  
33 84 consumption might be associated with high academic grades.<sup>4, 6-8</sup> Current studies on the  
34  
35  
36 85 association between physical activity and academic grades of children and adolescents are  
37  
38 86 inconsistent. With reported evidence of exercise affecting cognition,<sup>9</sup> the positive influence of  
39  
40  
41 87 appropriate physical activities on the academic grades of children and adolescents is observed.<sup>10, 11</sup>  
42  
43  
44 88 However, some studies have reported that additional or enhanced physical exercise do not show  
45  
46  
47 89 positive results in improving academic grades.<sup>12, 13</sup> Previous studies investigated the correlation of  
48  
49  
50 90 poor sleep quality with reduced learning capability and poor academic grades among children and  
51  
52  
53 91 adolescents.<sup>14, 15</sup> Studies on the correlation between students' screen time and their academic  
54  
55  
56 92 performance have shown that spending considerable time on watching television, videos, and  
57  
58  
59 93 social networking sites may be negatively associated with academic grades.<sup>16, 17</sup>

60 94 Previous studies mainly explored the association between a single lifestyle factor and the

1  
2  
3  
4 95 academic grades of students.<sup>2, 3, 16, 18</sup> However, some scholars have proposed that the relationship  
5  
6 96 between healthy lifestyle behaviors and academic performance is not isolated, and the combined  
7  
8  
9 97 effects of multiple healthy lifestyle behaviors on academic performance may be greater than any  
10  
11  
12 98 behavior alone.<sup>19-21</sup> To the best of our knowledge, limited studies have investigated the effect of  
13  
14 99 combined associations of multiple lifestyle behaviors on students' academic grades.<sup>22, 23</sup> Ickovics  
15  
16  
17 100 et al. found that children in grades 5-6 with high levels of "health assets" including indicators of  
18  
19  
20 101 healthy diet, physical activity, screen time, and sleep, are two times higher to meet the goal of  
21  
22  
23 102 standardized exams.<sup>22</sup> Faught et al. found that grade 5 students who met the recommendations for  
24  
25 103 7-9 lifestyle behaviors have higher odds of meeting the expectations for academic achievement  
26  
27  
28 104 compared with those who met three or less recommendations.<sup>23</sup> Given the importance of academic  
29  
30 105 grades for high school students, the independent and combined effects of lifestyle behaviors on the  
31  
32  
33 106 academic grades targeted this population need to be investigated.

34  
35 107 In the context of metropolitan China, "urban" refers to inner urban and peri-urban areas.  
36  
37  
38 108 Peri-urbanization refers to the dispersal of urban growth toward the rural surroundings of cities  
39  
40  
41 109 (urban sprawl), thereby creating landscapes that are characterized by urban and rural social and  
42  
43  
44 110 economic activities.<sup>24</sup> Inner urban districts have higher socioeconomic levels than peri-urban  
45  
46  
47 111 districts in China. The lifestyle of students may differ across various socioeconomic school  
48  
49  
50 112 levels<sup>25</sup> and may have different influences on the students' academic grades. Hence, this study  
51  
52  
53 113 aims to (1) explore the individual effects of lifestyle behaviors (physical activity before or after  
54  
55  
56 114 school, physical activity at school, sleep duration on weekdays and weekends, screen time on  
57  
58  
59 115 weekdays and weekends, consumption frequency of sugar-sweetened beverages (SSBs), breakfast,  
60  
116 lunch, dinner, vegetables, fruit, milk and milk alternatives, and the quantity of water and egg



1  
2  
3  
4 117 consumption) on the academic grades among inner urban high school students (IUHSSs) and  
5  
6 118 peri-urban high school students (PUHSSs) in grades 10 and 11 in Chongqing, China, and (2)  
7  
8  
9 119 explore the combined effects of lifestyle behaviors on the academic grades in IUHSSs and  
10  
11 120 PUHSSs. This study is expected to effectively promote multiple healthy lifestyle behaviors among  
12  
13  
14 121 high school students from areas with different economic levels and obtain a better understanding  
15  
16  
17 122 of the independent and combined effects of multiple lifestyle behaviors on the academic grades of  
18  
19  
20 123 high school students.

## 22 124 **METHODS**

### 25 125 **Study design and study sample**

26  
27 126 A cross-sectional survey was conducted in Chongqing among 1481 high school students.  
28  
29  
30 127 Chongqing is a municipality in midwestern China with 26 districts, including nine inner urban  
31  
32 128 districts and 17 peri-urban districts. One inner urban and two peri-urban districts, namely, Jiangbei,  
33  
34  
35 129 Dazu, and Kaixian Districts, were randomly chosen in Chongqing, and one high school was  
36  
37  
38 130 selected from each designated district. Six to twelve classes were randomly selected in each  
39  
40  
41 131 school, and all students in the selected classes were invited to participate in this study. High school  
42  
43 132 students in grades 10 and 11 were eligible to participate in this study. The exclusion criteria were  
44  
45  
46 133 students who have a history of major diseases, chronic health conditions, or mental trauma.  
47  
48  
49 134 Investigators explained the research and distributed the questionnaire to all students, and they  
50  
51 135 promptly completed the anonymous questionnaire independently.

### 53 136 **Patient and public involvement**

54  
55  
56 137 Patients or the public were not involved in the design, or conduct, or reporting, or dissemination  
57  
58  
59 138 plans of our research  
60

**139 Exposure**

140 The descriptions of fifteen questions in terms of lifestyle behaviors (physical activity, sleep  
141 duration, screen time, and dietary behaviors) are presented in Supplementary Table 1. Healthy  
142 lifestyle behaviors were assessed based on the recommended guidelines or previous studies. High  
143 school students who engage in moderate-to-high-intensity physical activity for more than 1 h a  
144 day and whose screen time is less than 2 h a day meet the physical activity guidelines for Chinese  
145 children and adolescents.<sup>26</sup> Average daily physical activity was categorized into  $\geq 1$  h and  $< 1$  h,  
146 and daily screen time was categorized into  $\geq 2$  h and  $< 2$  h. Insufficient sleep was defined as less  
147 than 8 h a day for high school students, as recommended by the Chinese Dietary Guideline 2016.<sup>27</sup>  
148 Sleep duration was categorized into  $\geq 8$  h and  $< 8$  h. In terms of dietary behaviors, participants were  
149 asked about the consumption frequency of SSBs, breakfast, lunch, dinner, vegetables, fruit, milk  
150 and milk alternatives, and the quantity of water and egg consumption. As recommended by the  
151 Chinese Dietary Guideline 2016,<sup>27</sup> water and egg consumption were divided into two categories,  
152 namely, meeting the guideline and not meeting the guideline. Consumption of SSBs less than once  
153 a week, consumption of breakfast, lunch and dinner five or more times per week, and consumption  
154 of vegetables, fruit, and milk and milk alternatives more than once per day were considered as  
155 healthy dietary behaviors.<sup>28-30</sup>

**156 Outcome**

157 Academic grades were approximately assessed based on the students' self-reports of grade ranking  
158 on the last cumulative examination in their grade, with the options being the top 25%, 25–50%,  
159 50–75% and lowest 25%. Answer selections were divided into two categories for analysis, namely,  
160 good (top 50%) and poor (last 50%) academic grades.

1  
2  
3  
4 **161 Potential confounders**

5  
6 162 Analyses were adjusted in terms of age, gender (male/female), residence (urban/rural), being an  
7  
8  
9 163 only child in the family (yes/no), boarding at school (yes/no), average monthly living expenses  
10  
11 164 (low:  $\leq 800$  RMB, medium: 801–1200 RMB, and high:  $>1200$  RMB), and parents' educational  
12  
13  
14 165 level (low: primary school or below, medium: secondary school/secondary vocational school/high  
15  
16  
17 166 school, and high: college or above).

18  
19 **167 Statistical analyses**

20  
21  
22 168 All analyses were performed with the Statistical Package for Social Sciences (SPSS) software  
23  
24 169 version 21 (IBM Corporation, Chicago, IL, USA). Invalid or missing data were excluded, and all  
25  
26  
27 170 data were double-checked. The categorical variables were described using frequency and  
28  
29  
30 171 percentiles, and the continuous variables were described as mean and standard deviation.  
31  
32 172 Chi-square test were conducted to examine the differences in lifestyle behaviors between IUHSSs  
33  
34  
35 173 and PUHSSs. The independent and combined effects of multiple lifestyle behaviors on academic  
36  
37  
38 174 grades were assessed through multivariate logistic regressions. Odds ratios (ORs) and their  
39  
40  
41 175 corresponding 95% confidence intervals (95% CI) were reported. An unadjusted logistic  
42  
43  
44 176 regression was used to assess the independent effects of each lifestyle behavior on the academic  
45  
46  
47 177 grades among IUHSSs and PUHSSs. Model 1 reported the results of multivariate regression  
48  
49  
50 178 analysis after adjusting the potential confounders (age, gender, residence, being an only child,  
51  
52  
53 179 boarding at the school, average monthly living expenses, and parents' educational level) and all  
54  
55  
56 180 lifestyle behaviors. The effect of the number of healthy lifestyle behaviors was considered to  
57  
58  
59 181 assess combined effects of multiple lifestyle behaviors on academic grades. The number of  
60  
182 healthy lifestyle behaviors was constructed, and the total number of healthy lifestyle behaviors

183 ranged from 0 to 13. The healthy lifestyle behaviors of students were divided into three categories  
 184 in accordance with the frequency distribution of the number of healthy lifestyle behaviors: low ( $\leq 6$   
 185 healthy lifestyle behaviors, 40.0%), medium (7–8 healthy lifestyle behaviors, 38.8%), and high  
 186 (9–13 healthy lifestyle behaviors, 21.2%). Treating the number of healthy lifestyle behaviors as  
 187 both categorical and continuous variables, univariable and multivariable regression models were  
 188 used to assess the cumulative effects of lifestyle behaviors on academic grades.  $p < 0.05$   
 189 (two-sided) was considered as statistical significance.

## 190 RESULTS

### 191 Sample characteristics

192 Table 1 shows the sample characteristics of participants. IUHSSs comprised 45.8% out of 1481  
 193 high school students (mean 16.3 years, 49.9% boys). Among the students, 64.6% lived in the city,  
 194 64.5% had siblings, and 58.0% were boarding at school. More than half (58.1%) of the students'  
 195 average monthly living expenses were less than 800 RMB. More than half of parental educational  
 196 level of the students were medium (56.2% and 54.6%, respectively). And 63.8% of the students'  
 197 academic grades were ranked as top 50% in their grade.

198 **Table 1** Demographic characteristics of participants (n = 1481)

| Variables    |             | n (%) or Mean $\pm$ SD |
|--------------|-------------|------------------------|
| School areas | Inner urban | 668 (45.8)             |
|              | Peri-urban  | 803 (54.2)             |
| Age          |             | 16.3 $\pm$ 0.9         |
| Gender       | Boy         | 739 (49.9)             |
|              | Girl        | 742 (50.1)             |

|                                       |          |            |
|---------------------------------------|----------|------------|
| Residence                             | City     | 957 (64.6) |
|                                       | Village  | 524 (35.4) |
| Only-child status                     | Yes      | 525 (35.5) |
|                                       | No       | 956 (64.5) |
| Boarding at school                    | Yes      | 859 (58.0) |
|                                       | No       | 622 (42.0) |
| Average monthly living expenses (RMB) | Low      | 861 (58.1) |
|                                       | Medium   | 465 (31.4) |
|                                       | High     | 155 (10.5) |
| Father's educational level            | Low      | 163 (11.0) |
|                                       | Medium   | 832 (56.2) |
|                                       | High     | 486 (32.8) |
| Mother's educational level            | Low      | 278 (18.8) |
|                                       | Medium   | 808 (54.6) |
|                                       | High     | 395 (26.6) |
| Academic grades                       | Top 50%  | 945 (63.8) |
|                                       | Last 50% | 536 (36.2) |

### 199 Lifestyle behaviors of participants

200 Table 2 shows the comparison of lifestyle behaviors between IUHSSs and PUHSSs. The  
 201 percentages of students meeting the recommendations of lifestyle behaviors were: 5.6% and  
 202 19.5% for daily physical activity before or after school and at school, respectively; 10.8% and  
 203 70.5% for daily sleep duration on weekdays and on weekends, respectively; 81.4% and 18.4% for

204 daily screen time on weekdays and on weekends, respectively; and 18.5% and 23.0% for water  
 205 and egg consumption, respectively. And 27.3% of the students drank SSBs less than once a week.  
 206 Breakfast, lunch and dinner consumption five times or more per week were 83.8%, 96.2%, and  
 207 79.1%, respectively. Vegetable, fruit and milk and milk alternatives consumption more than once  
 208 per day were 79.1%, 42.4% and 42.7%, respectively. All lifestyle behaviors varied between  
 209 IUHSSs and PUHSSs except for physical activity at school, frequency of breakfast, dinner and  
 210 vegetable intake, and water and egg consumption ( $p < 0.05$ ).

211 **Table 2** The comparison of lifestyles behaviors of students between inner urban and peri-urban  
 212 high schools in Chongqing, China (n = 1481)

| Variables                                | Total population | Inner urban (n = 678) | Peri-urban (n = 803) | $\chi^2$ | P      |
|------------------------------------------|------------------|-----------------------|----------------------|----------|--------|
| Physical activity before or after school |                  |                       |                      |          |        |
| <1 h                                     | 1,398 (94.4)     | 631 (93.1)            | 767 (95.5)           | 4.17     | 0.04   |
| $\geq 1$ h                               | 83 (5.6)         | 47 (6.9)              | 36 (4.5)             |          |        |
| Physical activity at school              |                  |                       |                      |          |        |
| <1 h                                     | 1,192 (80.5)     | 547 (80.7)            | 645 (80.3)           | 0.03     | 0.86   |
| $\geq 1$ h                               | 289 (19.5)       | 131 (19.3)            | 158 (19.7)           |          |        |
| Weekdays sleep time                      |                  |                       |                      |          |        |
| <8 h                                     | 1,321 (89.2)     | 643 (94.8)            | 678 (84.4)           | 41.30    | <0.000 |
| $\geq 8$ h                               | 160 (10.8)       | 35 (5.2)              | 125 (15.6)           |          |        |
| Weekends sleep time                      |                  |                       |                      |          |        |
| <8 h                                     | 437 (29.5)       | 171 (25.2)            | 266 (33.1)           | 11.04    | <0.000 |

|    |                           |              |            |            |       |        |
|----|---------------------------|--------------|------------|------------|-------|--------|
| 1  |                           |              |            |            |       |        |
| 2  |                           |              |            |            |       |        |
| 3  |                           |              |            |            |       |        |
| 4  | ≥8 h                      | 1044 (70.5)  | 507 (74.8) | 537 (66.9) |       |        |
| 5  |                           |              |            |            |       |        |
| 6  | Weekdays screen time      |              |            |            |       |        |
| 7  |                           |              |            |            |       |        |
| 8  |                           |              |            |            |       |        |
| 9  | ≥2 h                      | 276 (18.6)   | 157 (23.2) | 119 (14.8) | 16.85 | <0.000 |
| 10 |                           |              |            |            |       |        |
| 11 | <2 h                      | 1,205 (81.4) | 521 (76.8) | 684 (85.2) |       |        |
| 12 |                           |              |            |            |       |        |
| 13 |                           |              |            |            |       |        |
| 14 | Weekends screen time      |              |            |            |       |        |
| 15 |                           |              |            |            |       |        |
| 16 |                           |              |            |            |       |        |
| 17 | ≥2 h                      | 1,208 (81.6) | 581 (85.7) | 627 (78.1) | 14.16 | <0.000 |
| 18 |                           |              |            |            |       |        |
| 19 | <2 h                      | 273 (18.4)   | 97 (14.3)  | 176 (21.9) |       |        |
| 20 |                           |              |            |            |       |        |
| 21 |                           |              |            |            |       |        |
| 22 | Sugar-sweetened beverages |              |            |            |       |        |
| 23 |                           |              |            |            |       |        |
| 24 |                           |              |            |            |       |        |
| 25 | ≥5 times/week             | 343 (23.2)   | 174 (25.7) | 169 (21.1) | 51.30 | <0.001 |
| 26 |                           |              |            |            |       |        |
| 27 | 3-4 times/week            | 333 (22.5)   | 169 (24.9) | 164 (20.4) |       |        |
| 28 |                           |              |            |            |       |        |
| 29 |                           |              |            |            |       |        |
| 30 | 1-2 times/week            | 401 (27.1)   | 211 (31.1) | 190 (23.6) |       |        |
| 31 |                           |              |            |            |       |        |
| 32 | <once/week                | 404 (27.3)   | 124 (18.3) | 280 (34.9) |       |        |
| 33 |                           |              |            |            |       |        |
| 34 |                           |              |            |            |       |        |
| 35 | Breakfast                 |              |            |            |       |        |
| 36 |                           |              |            |            |       |        |
| 37 |                           |              |            |            |       |        |
| 38 | <5 times/week             | 240 (16.2)   | 110 (16.2) | 130 (16.2) | 0.00  | 0.99   |
| 39 |                           |              |            |            |       |        |
| 40 | ≥5 times/week             | 1,241 (83.8) | 568 (83.8) | 673 (83.8) |       |        |
| 41 |                           |              |            |            |       |        |
| 42 |                           |              |            |            |       |        |
| 43 | Lunch                     |              |            |            |       |        |
| 44 |                           |              |            |            |       |        |
| 45 | <5 times/week             | 56 (3.8)     | 14 (2.1)   | 42 (5.2)   | 10.12 | 0.001  |
| 46 |                           |              |            |            |       |        |
| 47 |                           |              |            |            |       |        |
| 48 | ≥5 times/week             | 1,425 (96.2) | 664 (97.9) | 761 (94.8) |       |        |
| 49 |                           |              |            |            |       |        |
| 50 |                           |              |            |            |       |        |
| 51 | Dinner                    |              |            |            |       |        |
| 52 |                           |              |            |            |       |        |
| 53 | <5 times/week             | 309 (20.9)   | 155 (22.9) | 154 (19.2) | 3.02  | 0.08   |
| 54 |                           |              |            |            |       |        |
| 55 |                           |              |            |            |       |        |
| 56 | ≥5 times/week             | 1,172 (79.1) | 523 (77.1) | 649 (80.8) |       |        |
| 57 |                           |              |            |            |       |        |
| 58 | Vegetables                |              |            |            |       |        |
| 59 |                           |              |            |            |       |        |
| 60 |                           |              |            |            |       |        |

|    |                                     |              |            |            |        |        |
|----|-------------------------------------|--------------|------------|------------|--------|--------|
| 1  |                                     |              |            |            |        |        |
| 2  |                                     |              |            |            |        |        |
| 3  |                                     |              |            |            |        |        |
| 4  | <once/day                           | 310 (20.9)   | 156 (23.0) | 154 (19.2) | 3.26   | 0.07   |
| 5  |                                     |              |            |            |        |        |
| 6  | ≥once/day                           | 1,171 (79.1) | 522 (77.0) | 649 (80.8) |        |        |
| 7  |                                     |              |            |            |        |        |
| 8  |                                     |              |            |            |        |        |
| 9  | Fruit                               |              |            |            |        |        |
| 10 |                                     |              |            |            |        |        |
| 11 | <once/day                           | 853 (57.6)   | 349 (51.5) | 504 (62.8) | 19.18  | <0.000 |
| 12 |                                     |              |            |            |        |        |
| 13 | ≥once/day                           | 628 (42.4)   | 329 (48.5) | 299 (37.2) |        |        |
| 14 |                                     |              |            |            |        |        |
| 15 |                                     |              |            |            |        |        |
| 16 |                                     |              |            |            |        |        |
| 17 | Milk and milk alternatives          |              |            |            |        |        |
| 18 |                                     |              |            |            |        |        |
| 19 | <once/day                           | 849 (57.3)   | 290 (42.8) | 559 (69.6) | 108.26 | <0.000 |
| 20 |                                     |              |            |            |        |        |
| 21 | ≥once/day                           | 632 (42.7)   | 388 (57.2) | 244 (30.4) |        |        |
| 22 |                                     |              |            |            |        |        |
| 23 |                                     |              |            |            |        |        |
| 24 | Meeting water intake recommendation |              |            |            |        |        |
| 25 |                                     |              |            |            |        |        |
| 26 | No                                  | 1,207 (81.5) | 544 (80.2) | 663 (82.6) | 1.32   | 0.25   |
| 27 |                                     |              |            |            |        |        |
| 28 | Yes                                 | 274 (18.5)   | 134 (19.8) | 140 (17.4) |        |        |
| 29 |                                     |              |            |            |        |        |
| 30 |                                     |              |            |            |        |        |
| 31 |                                     |              |            |            |        |        |
| 32 | Meeting egg intake recommendation   |              |            |            |        |        |
| 33 |                                     |              |            |            |        |        |
| 34 | No                                  | 1,141 (77.0) | 508 (74.9) | 633 (78.8) | 3.17   | 0.08   |
| 35 |                                     |              |            |            |        |        |
| 36 | Yes                                 | 340 (23.0)   | 170 (25.1) | 170 (21.2) |        |        |
| 37 |                                     |              |            |            |        |        |
| 38 |                                     |              |            |            |        |        |
| 39 |                                     |              |            |            |        |        |

213 **Logistic regression for identifying the independent association of lifestyle behaviors with**

214 **academic grades among IUHSSs and PUHSSs**

215 The results of the logistic regression analysis for identifying the independent effects of multiple

216 lifestyle behaviors on academic grades are shown in Table 3. In the unadjusted model, among

217 IUHSSs, meeting the recommendations for screen time on weekdays (OR = 1.73, 95% CI

218 [1.20–2.51]) and daily egg consumption (OR = 1.59, 95% CI [1.07–2.35]), regularly eating dinner

219 (≥5 times/week vs. <5 times/week: OR = 1.49, 95% CI [1.02–2.16]), high frequency of fruit

220 consumption (≥once/week vs. <once/week: OR = 1.46, 95% CI [1.05–2.02]), and high frequency



1  
2  
3  
4 221 of milk and milk alternatives consumption ( $\geq$ once/week vs.  $<$ once/week: OR = 1.50, 95% CI  
5  
6 222 [1.08–2.07]) had significant univariate associations with high academic grades; students who met  
7  
8  
9 223 the recommendations for sleep duration on weekday (OR = 0.47, 95% CI [0.24–0.94]) and high  
10  
11 224 frequency of SSBs consumption ( $\geq$ 5 times/week vs.  $<$ once/week: OR = 0.46, 95% CI [0.28–0.77])  
12  
13  
14 225 were unlikely to obtain high academic grades. Among PUHSSs, meeting the recommendations for  
15  
16  
17 226 daily screen duration on weekdays and on weekends (OR = 1.56, 95% CI [1.04–2.35] and OR =  
18  
19 227 1.42, 95% CI [1.05–1.91], respectively) had significant univariate associations with high academic  
20  
21  
22 228 grades; students with high frequency of SSBs consumption (3–4 times/week vs.  $<$ once/week: OR  
23  
24  
25 229 = 0.65, 95% CI [0.44–0.97]) were unlikely to obtain high academic grades.

26  
27 230 In the Model 1, after adjusting the potential confounders (age, gender, residence, being an  
28  
29  
30 231 only child in the family, boarding at school, average monthly living expenses, and parents'  
31  
32  
33 232 educational level) and all lifestyle behaviors, among IUHSSs, meeting the recommendations for  
34  
35  
36 233 screen time on weekdays (OR = 1.57, 95% CI [1.06–2.34]) and daily egg consumption (OR = 1.60,  
37  
38 234 95% CI [1.04–2.47]), and high frequency of fruit consumption ( $\geq$ once/week vs.  $<$ once/week: OR  
39  
40 235 = 1.67, 95% CI [1.11–2.50]) were still significantly correlated with high academic grades;  
41  
42  
43 236 students who met the recommendations for sleep duration on weekdays (OR = 0.46, 95% CI  
44  
45  
46 237 [0.21–0.98]) and high frequency of SSBs consumption ( $\geq$  5 times/week vs.  $<$ once/week: OR =  
47  
48 238 0.56, 95% CI [0.32–0.99]) were still unlikely to obtain high academic grades. Among PUHSSs,  
49  
50  
51 239 meeting the recommendations for sleep duration on weekends (OR = 1.40, 95% CI [1.02–1.93])  
52  
53  
54 240 and regularly eating dinner ( $\geq$  5 times/week vs.  $<$ 5 times/week: OR = 1.55, 95% CI [1.01–2.37])  
55  
56 241 were significantly correlated with high academic grades; students with high frequency of SSBs  
57  
58  
59 242 consumption (3-4 times/week vs.  $<$ once/week: OR = 0.63, 95% CI [0.41–0.95]) were still unlikely  
60

1  
2  
3  
4 243 to obtain high academic grades.  
5

6 244 The results of the logistic regression analysis for identifying the combined effects of multiple  
7  
8  
9 245 lifestyle behaviors on academic grades are shown in Table 4. In the unadjusted model, the number  
10  
11  
12 246 of healthy lifestyle behaviors was considered as a continuous variable, the number of healthy  
13  
14  
15 247 lifestyle behaviors was positive associated with academic grades among IUHSSs (OR = 1.22, 95%  
16  
17 248 CI [1.11–1.33]). And the number of healthy lifestyle behaviors was also considered as a  
18  
19  
20 249 categorical variable. IUHSSs who had seven to eight healthy lifestyle behaviors were more likely  
21  
22 250 to obtain high academic grades than those who had six or less healthy lifestyle behaviors (OR =  
23  
24  
25 251 1.54, 95% CI [1.08–2.21]), and IUHSSs who had 9–13 healthy lifestyle behaviors had 3.05 times  
26  
27 252 higher odds of obtaining high academic grades than those who had six or less healthy lifestyle  
28  
29  
30 253 behaviors (OR = 3.05, 95% CI [1.88–4.95]). No differences were found between the number of  
31  
32  
33 254 healthy lifestyle behaviors and academic grades among PUHSSs ( $P > 0.05$ ).

34  
35 255 In Model 1, after adjusting for the possible confounders, the number of healthy lifestyle  
36  
37  
38 256 behaviors among IUHSSs was positive associated with academic grades (OR = 1.23, 95% CI  
39  
40  
41 257 [1.11–1.35]). And IUHSSs who had seven to eight healthy lifestyle behaviors were more likely to  
42  
43  
44 258 obtain high academic grades than those who had six or less healthy lifestyle behaviors (OR = 1.54,  
45  
46 259 95% CI [1.06–2.24]), IUHSSs who had 9–13 healthy lifestyle behaviors had 3.25 times higher  
47  
48  
49 260 odds of obtaining high academic grades than those who had six or less healthy lifestyle behaviors  
50  
51 261 (OR = 3.25, 95% CI [1.96–5.40]). No differences were still found between the number of healthy  
52  
53  
54 262 lifestyle behaviors and academic grades among PUHSSs ( $p > 0.05$ ).

263 **Table 3** Logistic regression for identifying the association between lifestyle behaviors and academic grades among inner urban and peri-urban high school students in  
 264 Chongqing, China (n = 1481)

| Variables                                | Inner urban high school students |             |                         |             | Peri-urban high school students |             |                         |             |
|------------------------------------------|----------------------------------|-------------|-------------------------|-------------|---------------------------------|-------------|-------------------------|-------------|
|                                          | Unadjusted                       |             | Model 1 <sup>a</sup>    |             | Unadjusted                      |             | Model 1 <sup>a</sup>    |             |
|                                          | OR (95% CI)                      | <i>p</i>    | OR (95% CI)             | <i>p</i>    | OR (95% CI)                     | <i>p</i>    | OR (95% CI)             | <i>p</i>    |
| Physical activity before or after school |                                  |             |                         |             |                                 |             |                         |             |
| ≥1 h vs. <1 h                            | 1.00 (0.53-1.88]                 | 0.99        | 1.50 (0.72-3.15)        | 0.28        | 0.51 (0.26-1.01)                | 0.05        | 0.57 (0.27-1.18)        | 0.13        |
| Physical activity at school              |                                  |             |                         |             |                                 |             |                         |             |
| ≥1 h vs. <1 h                            | 0.74 (0.49-1.09)                 | 0.13        | 0.77 (0.48-1.23)        | 0.272       | 0.88 (0.62-1.25)                | 0.46        | 0.98 (0.66-1.44)        | 0.91        |
| Sleep duration on weekdays               |                                  |             |                         |             |                                 |             |                         |             |
| ≥8h vs. <8h                              | <b>0.47 (0.24-0.94)</b>          | <b>0.03</b> | <b>0.46 (0.21-0.98)</b> | <b>0.04</b> | <b>1.56 (1.04-2.35)</b>         | <b>0.03</b> | 1.41 (0.92-2.18)        | 0.12        |
| Sleep duration on weekends               |                                  |             |                         |             |                                 |             |                         |             |
| ≥8h vs. <8h                              | 1.35 (0.94-1.94)                 | 0.11        | 1.38 (0.93-2.05)        | 0.11        | <b>1.42 (1.05-1.91)</b>         | <b>0.02</b> | <b>1.40 (1.02-1.93)</b> | <b>0.04</b> |

---

 Screen time on weekdays

<2h vs. ≥2h      **1.73 (1.20-2.51)**      **0.004**      **1.57 (1.06-2.34)**      **0.02**      0.90 (0.61-1.35)      0.63      0.89 (0.58-1.36)      0.59

## Screen time on weekends

<2h vs. ≥2h      1.41 (0.87-2.29)      0.17      1.15 (0.68-1.96)      0.60      0.74 (0.53-1.04)      0.09      0.74 (0.51-1.08)      0.12

## Sugar-sweetened beverages

≥5 times/week vs. <once/week      **0.46 (0.28-0.77)**      **0.003**      **0.56 (0.32-0.99)**      **0.04**      0.93 (0.62-1.37)      0.70      0.98 (0.63-1.53)      0.94

3-4 times/week vs. <once/week      0.88 (0.52-1.50)      0.64      1.04 (0.59-1.85)      0.89      **0.65 (0.44-0.97)**      **0.03**      **0.62 (0.41-0.95)**      **0.03**

Once or twice a week vs. <once a week      0.64 (0.39-1.06)      0.08      0.75 (0.44-1.28)      0.29      0.79 (0.54-1.16)      0.23      0.80 (0.54-1.19)      0.27

## Breakfast

≥5 times/week vs. <5 times/week      1.40 (0.92-2.14)      0.12      1.08 (0.67-1.77)      0.75      1.17 (0.80-1.71)      0.41      1.05 (0.70-1.59)      0.81

## Lunch

≥5 times/week vs. <5 times/week      0.85 (0.26-2.75)      0.79      0.59 (0.17-2.08)      0.41      1.40 (0.75-2.60)      0.29      1.16 (0.58-2.32)      0.68

## Dinner

1  
2  
3  
4  
5  
6  
7  
8  
9  
10  
11  
12  
13  
14  
15  
16  
17  
18  
19  
20  
21  
22  
23  
24  
25  
26  
27  
28  
29  
30  
31  
32  
33  
34  
35  
36  
37  
38  
39  
40  
41  
42  
43  
44  
45  
46

---

|                                          |                         |             |                         |             |                  |      |                         |             |
|------------------------------------------|-------------------------|-------------|-------------------------|-------------|------------------|------|-------------------------|-------------|
| ≥5 times/week vs. <5 times/week          | <b>1.49 (1.02-2.16)</b> | <b>0.04</b> | 1.48 (0.98-2.24)        | 0.06        | 1.42 (1.00-2.02) | 0.05 | <b>1.55 (1.01-2.37)</b> | <b>0.04</b> |
| Vegetables                               |                         |             |                         |             |                  |      |                         |             |
| ≥once a day vs. <once a day              | 1.09 (0.75-1.60)        | 0.65        | 0.88 (0.57-1.35)        | 0.56        | 0.75 (0.52-1.08) | 0.13 | 0.74 (0.49-1.10)        | 0.14        |
| Fruit                                    |                         |             |                         |             |                  |      |                         |             |
| ≥once a day vs. <once a day              | <b>1.46 (1.05-2.02)</b> | <b>0.02</b> | <b>1.67 (1.11-2.50)</b> | <b>0.01</b> | 0.92 (0.69-1.23) | 0.57 | 0.94 (0.67-1.33)        | 0.74        |
| Milk and milk alternatives               |                         |             |                         |             |                  |      |                         |             |
| ≥once a day vs. <once a day              | <b>1.50 (1.08-2.07)</b> | <b>0.01</b> | 1.19 (0.82-1.74)        | 0.35        | 1.01 (0.74-1.37) | 0.97 | 1.01 (0.70-1.45)        | 0.97        |
| Meeting water consumption recommendation |                         |             |                         |             |                  |      |                         |             |
| Yes vs. no                               | 1.48 (0.96-2.27)        | 0.07        | 1.42 (0.90-2.26)        | 0.14        | 0.96 (0.66-1.39) | 0.82 | 1.05 (0.71-1.55)        | 0.82        |
| Meeting egg consumption recommendation   |                         |             |                         |             |                  |      |                         |             |
| Yes vs. no                               | <b>1.59 (1.07-2.35)</b> | <b>0.02</b> | <b>1.60 (1.04-2.47)</b> | <b>0.03</b> | 1.06 (0.75-1.49) | 0.76 | 1.03 (0.71-1.49)        | 0.87        |

1  
2  
3  
4  
5 265 <sup>a</sup> Adjusted for age, gender, residence, only-child status in the family, boarding at school, average monthly living expenses, education level of parents and all lifestyle  
6 266 behaviors  
7 267 Results in bold are statistically significant ( $p < 0.05$ )

9 268 **Table 4** Logistic regression for identifying the combined effects of multiple lifestyle behaviors on academic grades

| Variables                                         | Inner urban high school students |                  |                         |                  | Peri-urban high school students |          |                      |          |
|---------------------------------------------------|----------------------------------|------------------|-------------------------|------------------|---------------------------------|----------|----------------------|----------|
|                                                   | Unadjusted                       |                  | Model 1 <sup>a</sup>    |                  | Unadjusted                      |          | Model 1 <sup>a</sup> |          |
|                                                   | OR (95% CI)                      | <i>p</i>         | OR (95% CI)             | <i>p</i>         | OR (95% CI)                     | <i>p</i> | OR (95% CI)          | <i>p</i> |
| Multiple healthy lifestyle <sup>b</sup>           | <b>1.22 (1.11-1.33)</b>          | <b>&lt;0.001</b> | <b>1.23 (1.11-1.35)</b> | <b>&lt;0.001</b> | 1.03 (0.96- 1.11)               | 0.42     | 1.03 (0.95-1.12)     | 0.45     |
| Number of multiple healthy lifestyle <sup>b</sup> |                                  |                  |                         |                  |                                 |          |                      |          |
| 6 or less                                         | Ref                              |                  | Ref                     |                  | Ref                             |          | Ref                  |          |
| 7-8                                               | <b>1.54 (1.08- 2.21)</b>         | <b>0.02</b>      | <b>1.54 (1.06-2.24)</b> | <b>0.02</b>      | 1.02 (0.74- 1.40)               | 0.90     | 1.00 (0.72-1.39)     | 1.00     |
| 9-13                                              | <b>3.05 (1.88- 4.95)</b>         | <b>&lt;0.001</b> | <b>3.25 (1.96-5.40)</b> | <b>&lt;0.001</b> | 1.02 (0.69-1.49)                | 0.94     | 1.03 (0.68-1.54)     | 0.68     |

33 269 <sup>a</sup> Adjusted for age, gender, residence, only-child status, boarding at school, average monthly living expenses, education level of parents and all lifestyle behaviors

34 270 <sup>b</sup> Includes physical activity before or after school, physical activity at school, sleep duration on weekdays and weekends, screen time on weekdays and weekends, the  
35 271 consumption frequency of SSBs, breakfast, lunch, dinner, vegetables, fruit, milk and milk alternatives, and the quantity of water and egg consumption

37 272 Results in bold are statistically significant ( $p < 0.05$ )

## DISCUSSION

Lifestyle behaviors of high school students appear to be associated with academic grades, and the cumulative effects of healthy lifestyle behaviors have a stronger positive association with their academic outcomes than the independent effects. These findings are particularly applicable to IUHSSs. Lifestyle behaviors are closely related to health, even education. The findings in this study revealed that health promotion initiatives targeting multiple lifestyle behaviors of high school students may have positive effects on academic achievement.

Previous studies reported that meeting the recommendation of sleep duration was positively associated with the academic grades of children and adolescents.<sup>14, 15</sup> Sleep is thought to play a crucial and specific role in memory consolidation, and lack of sleep was linked to increased fatigue and sleepiness, and poor attention and cognition.<sup>31, 32</sup> However, the association between sleep duration and academic grades among IUHSSs and PUHSSs was inconsistent in this study. Among PUHSSs, meeting the recommendation for sleep duration on weekdays and on weekends had positive effects on students' academic grades. By contrast, a negative association was found between weekdays' sleep duration adherence to the recommendation and academic grades among IUHSSs. Outstanding teachers in inner urban schools account for approximately two-thirds in Chongqing because of the regional and economic development.<sup>33</sup> Inner urban high schools may have stricter rules and tighter schedules compared with peri-urban high schools, and insufficient sleep may be common among IUHSSs. The result of this study showed that extremely few IUHSSs (5.2%) had 8 h or more sleep duration on weekdays. We speculated that these students who slept 8 h or more on weekdays may sleep at other times, such as during class or independent study time, leading to less study time. This could be the possible explanation for the negative

1  
2  
3  
4 association between weekdays' sleep duration adherence to the recommendation and academic  
5  
6 grades among IUHSSs.  
7

8  
9 A previous systematic review and meta-analysis indicated that television viewing and video  
10  
11 game playing were negatively associated with academic outcomes, while overall screen time  
12  
13 (including watching television, playing electronic games, receiving electronic news and study  
14  
15 materials, and using social networking sites) was not associated with academic outcomes among  
16  
17 children and adolescents aged 4 to 18 years.<sup>16</sup> The screen time surveyed in this study was overall  
18  
19 screen time. The results revealed that meeting the recommendation for screen time on weekdays  
20  
21 had positive effects on academic grades, and the association between weekends' screen time and  
22  
23 academic performance was statistically insignificant among IUHSSs. One possible explanation  
24  
25 could be that Chinese high school students are not allowed to use electronic devices on weekdays  
26  
27 owing to the strict regulations, but they may use electronic devices in "cram schools" on weekends  
28  
29 for receiving electronic news and study materials that may neutralize the negative effect of  
30  
31 screen-based behaviors. No association was found among PUHSSs. The reason could be that  
32  
33 students from inner urban areas may have greater access to screen devices and would be more  
34  
35 likely to engage in screen time behaviors compared with those from peri-urban high schools.  
36  
37  
38  
39  
40  
41  
42  
43  
44

45 The results in the present study showed increased odds of high academic grades among  
46  
47 PUHSSs who had regular dinner consumption, and no association was observed between breakfast  
48  
49 consumption and academic grades. Few studies have explored the relationship between a regular  
50  
51 meal pattern throughout the day and academic grades. Many previous studies showed the  
52  
53 positive effects of regular breakfast consumption on students' academic grades, and most of them  
54  
55 focused on young students.<sup>2, 6, 34</sup> A study reported that a regular intake of breakfast and lunch was  
56  
57  
58  
59  
60



1  
2  
3  
4 more crucial in grades 5 and 8 students compared with grade 11, whereas a regular intake of  
5  
6 dinner was more likely related to academic achievement in grade 11 students compared with grade  
7  
8  
9 5 and grade 8 students.<sup>35</sup> In the present study, eating breakfast, lunch, and dinner five times or less  
10  
11 per week accounted for 16.8%, 3.8% and 20.9%, respectively. The frequency of eating dinner five  
12  
13 times or less per week accounted for the highest proportion, possibly because the heavy  
14  
15 schoolwork resulting in insufficient time for dinner or skipping dinner was served as a weight  
16  
17 control measure among high school students. However, Chinese high school students were  
18  
19 required to attend evening classes lasting for several hours,<sup>36</sup> and skipping dinner may affect the  
20  
21 learning efficiency of evening classes, which may have an important effect on students' academic  
22  
23 grades. This could be the reason that regularly eating dinner is positively correlated with academic  
24  
25 grades. Health education related to regular meal patterns throughout the day must be conducted  
26  
27 among high school students, particularly emphasizing the importance of eating dinner. In IUHSSs  
28  
29 and PUHSSs, high frequency of SSBs consumption was unlikely to obtain high academic grades.  
30  
31 Additionally, among IUHSSs, meeting the recommendations for egg consumption and high  
32  
33 frequency of fruit consumption had significant association with high academic grades. These  
34  
35 results were largely similar to previous studies<sup>8, 23, 37</sup> that demonstrated that healthy dietary  
36  
37 behaviors, such as frequent fruit consumption, were associated with high academic performance,  
38  
39 whereas unhealthy dietary behaviors, including high frequency of SSBs consumption, were  
40  
41 associated with low academic performance.  
42  
43  
44  
45  
46  
47  
48  
49  
50  
51

52  
53 In this study, no association was found between physical activity before or after school,  
54  
55 physical activity at school, and academic grades in IUHSSs and PUHSSs. Most laboratory trials,  
56  
57 cohort-based or cross-sectional studies have demonstrated the positive effect of physical activity  
58  
59  
60

1  
2  
3  
4 on cognitive function,<sup>38-41</sup> while, studies on physical activity and academic grades have produced  
5  
6 mixed results.<sup>42, 43</sup> A previous study found a curvilinear relationship between physical activity and  
7  
8 academic achievement, thereby suggesting that top sports students may have an additional  
9  
10 extracurricular physical activity that displaced the time spent on academics.<sup>44</sup> Moreover, under the  
11  
12 social, cultural, and educational background of China, many schools have reduced the physical  
13  
14 education curriculum to maximize the study time on subjects important for exams.<sup>18</sup> This  
15  
16 phenomenon is particularly prominent in high schools, where high school students need to prepare  
17  
18 for the National College Entrance Examination.<sup>1</sup> The results of this study showed that only 5.6%  
19  
20 of the students met the recommendation for physical activity. Considering these factors, the  
21  
22 cut-off values of the recommendation for daily physical activity may be inappropriate to assess the  
23  
24 association between physical activity and academic grades of high school students, and this could  
25  
26 be the reason for the lack of correlation between physical activity and academic grades in IUHSSs  
27  
28 and PUHSSs. This was also mentioned in a previous study targeting the association between  
29  
30 physical activity and academic achievement among elementary school students.<sup>23</sup> Choosing the  
31  
32 appropriate method to assess physical activity of high school students is still needed to be explored  
33  
34 in future studies, thereby to better explore its association with academic performance.

35  
36  
37  
38  
39  
40  
41  
42  
43  
44  
45 The findings demonstrated that the combined effects of multiple lifestyle behaviors resulted  
46  
47 in a substantially higher likelihood of obtaining academic grades than the independent effects  
48  
49 among IUHSSs, which was similar with the results of previous studies that investigated the  
50  
51 combined effects of meeting recommendations for diet, physical activity, screen time and sleep on  
52  
53 academic achievement of primary school students.<sup>22, 23</sup> The present study complements and  
54  
55 extends these important findings drawing in high school students. Given the importance of  
56  
57  
58  
59  
60

1  
2  
3  
4 academic grades for high school students, this study could provide valuable references for health  
5  
6 promotion initiatives that lead to improvement in academic grades. Interventions aiming to  
7  
8 improve multiple lifestyle behaviors may have a greater positive effect on academic grades of high  
9  
10 school students than those focusing on a single lifestyle behavior.  
11  
12

13  
14 This study has certain limitations. First, the use of cross-sectional survey data reduces the  
15  
16 researchers' ability to make direct causal inferences. Future longitudinal studies should be  
17  
18 conducted to confirm the findings of the present study. Second, lifestyle behaviors and academic  
19  
20 grades were obtained by self-report that may introduce bias caused by self-enhancement and  
21  
22 measurement flaws. Third, being an exploratory study, the questionnaire developed was not  
23  
24 evaluated for its reliability and validity. However, questions on physical activity, sleep duration,  
25  
26 and screen time were adapted from the China Health and Nutrition Survey,<sup>45</sup> and questions on  
27  
28 dietary behaviors were adapted from Chinese Dietary Guideline 2016.<sup>27</sup> And expert input, pilot  
29  
30 and review was done before implementation. The unvalidated measures in the questionnaire  
31  
32 designed to measure the outcome variables may raise potential issues related to reliability. Further  
33  
34 studies should consider validating the questionnaire prior to administration.  
35  
36  
37  
38  
39  
40  
41

## 42 **CONCLUSIONS**

43  
44 This study demonstrated that a correlation is found between the lifestyle behaviors of high school  
45  
46 students and academic grades, and cumulative effects of healthy lifestyle behaviors have a  
47  
48 stronger positive association with academic grades than the independent effects. These findings  
49  
50 are particularly applicable to IUHSSs. The importance of multiple healthy lifestyle behaviors for  
51  
52 academic grades of high school students should be considered by public health decision makers  
53  
54 and school principals or management bodies in the high school settings.  
55  
56  
57  
58  
59  
60

## Abbreviations

IUHSSs: inner urban high school students; PUHSSs: peri-urban high school students; SSBs: sugar-sweetened beverages; SPSS: Statistical Package for Social Sciences; OR: odds ratios; CI: confidence intervals.

## Ethics approval and consent to participate

This study was reviewed and approved by the Ethics Committee of Chongqing Medical University. Informed consent was obtained from all participants, and they could voluntarily participate or withdraw from the study at any stage.

## Availability of data and materials

The datasets used and/or analyzed during the current study are available from the corresponding author on reasonable request.

## Competing interests

The authors declare that they have no competing interests.

## Funding

This study was funded by the Postgraduate Scientific Research and Innovation Project of Chongqing, grant number CYS19208.

## Authors' Contributions

ZC carried out investigation, data analysis and wrote the paper. JX, HZ, HP provided help with the investigation and data collection. JX, AC, ZZ, SM provided the assistance in reviewing the paper. YZ provided guidance in study design, organized the investigation, and is the corresponding author. All authors approved the final manuscript.

## Acknowledgments

We would like to thank the support of the Postgraduate Scientific Research and Innovation Project of Chongqing (CYS19208). Also, we would like to thank all the teachers and class leaders who helped us coordinate the survey. We thank all the participants for their support of this project. We also would like to acknowledge all the investigators who participated in the survey.

## References

- 1 Kirkpatrick R, Zang YB. The Negative Influences of Exam-Oriented Education on Chinese High School Students: Backwash from Classroom to Child. *Language Testing in Asia* 2011;1(3):36.
- 2 Yao J, Liu Y, Zhou S. Effect of Eating Breakfast on Cognitive Development of Elementary and Middle School Students: An Empirical Study Using Large-Scale Provincial Survey Data. *Medical science monitor : international medical journal of experimental and clinical research* 2019;25:8843-53.
- 3 Chen WL, Chen JH. Consequences of inadequate sleep during the college years: Sleep deprivation, grade point average, and college graduation. *Prev Med* 2019;124:23-28.
- 4 Scott SP, De Souza MJ, Koehler K, et al. Combined Iron Deficiency and Low Aerobic Fitness Doubly Burden Academic Performance among Women Attending University. *The Journal of nutrition* 2017;147(1):104-09.
- 5 Burrows T, Goldman S, Pursey K, et al. Is there an association between dietary intake and academic achievement: a systematic review. *J Hum Nutr Diet* 2017;30(2):117-40.
- 6 Ptomey LT, Steger FL, Schubert MM, et al. Breakfast Intake and Composition Is Associated with Superior Academic Achievement in Elementary Schoolchildren. *J Am Coll Nutr* 2016;35(4):326-33.
- 7 Kooshki A, Mohammadi M, Rivandi M. Nutritional intake and its association with educational achievement in high-school students in Islamic Republic of Iran. *East Mediterr Health J* 2018;24(6):532-37.
- 8 Burrows T, Goldman S, Olson RK, et al. Associations between selected dietary behaviours and academic achievement: A study of Australian school aged children. *Appetite* 2017;116:372-80.
- 9 Hotting K, Roder B. Beneficial effects of physical exercise on neuroplasticity and cognition. *Neuroscience and biobehavioral reviews* 2013;37(9 Pt B):2243-57.
- 10 Stea TH, Torstveit MK. Association of lifestyle habits and academic achievement in Norwegian adolescents: a cross-sectional study. *BMC Public Health* 2014;14:829.
- 11 Edwards JU, Mauch L, Winkelman MR. Relationship of nutrition and physical activity behaviors and fitness measures to academic performance for sixth graders in a midwest city school district. *J Sch Health* 2011;81(2):65-73.
- 12 Resaland GK, Aadland E, Moe VF, et al. Effects of physical activity on schoolchildren's academic performance: The Active Smarter Kids (ASK) cluster-randomized controlled trial. *Prev Med* 2016;91:322-28.
- 13 Singh AS, Saliassi E, van den Berg V, et al. Effects of physical activity interventions on cognitive and academic performance in children and adolescents: a novel combination of a systematic review and recommendations from an expert panel. *British journal of sports medicine* 2019;53(10):640-47.
- 14 Hysing M, Harvey AG, Linton SJ, et al. Sleep and academic performance in later adolescence:

- 1  
2  
3 results from a large population-based study. *Journal of sleep research* 2016;25(3):318-24.
- 4 15 Wolfson AR, Carskadon MA. Understanding adolescents' sleep patterns and school performance: a  
5 critical appraisal. *Sleep medicine reviews* 2003;7(6):491-506.
- 6 16 Adelantado-Renau M, Moliner-Urdiales D, Cavero-Redondo I, et al. Association Between Screen  
7 Media Use and Academic Performance Among Children and Adolescents: A Systematic Review and  
8 Meta-analysis. *JAMA pediatrics* 2019
- 9 17 Yan H, Zhang R, Oniffrey TM, et al. Associations among Screen Time and Unhealthy Behaviors,  
10 Academic Performance, and Well-Being in Chinese Adolescents. *Int J Environ Res Public Health*  
11 2017;14(6)
- 12 18 Zhang Y, Zhang D, Jiang Y, et al. Association between physical activity and teacher-reported  
13 academic performance among fifth-graders in Shanghai: a quantile regression. *PLoS One*  
14 2015;10(3):e0115483.
- 15 19 Martínez-Gómez D, Veiga OL, Gómez-Martínez S, et al. Gender-specific influence of health  
16 behaviors on academic performance in Spanish adolescents: the AFINOS study. *Nutricion hospitalaria*  
17 2012;27(3):724-30.
- 18 20 Bradley BJ, Greene AC. Do health and education agencies in the United States share responsibility  
19 for academic achievement and health? A review of 25 years of evidence about the relationship of  
20 adolescents' academic achievement and health behaviors. *The Journal of adolescent health : official*  
21 *publication of the Society for Adolescent Medicine* 2013;52(5):523-32.
- 22 21 Kamath CC, Vickers KS, Ehrlich A, et al. Clinical review: behavioral interventions to prevent  
23 childhood obesity: a systematic review and metaanalyses of randomized trials. *The Journal of clinical*  
24 *endocrinology and metabolism* 2008;93(12):4606-15.
- 25 22 Ickovics JR, Carroll-Scott A, Peters SM, et al. Health and academic achievement: cumulative effects  
26 of health assets on standardized test scores among urban youth in the United States. *J Sch Health*  
27 2014;84(1):40-8.
- 28 23 Faught EL, Ekwaru JP, Gleddie D, et al. The combined impact of diet, physical activity, sleep and  
29 screen time on academic achievement: a prospective study of elementary school students in Nova  
30 Scotia, Canada. *Int J Behav Nutr Phys Act* 2017;14(1):29.
- 31 24 Zhao P. Too complex to be managed? New trends in peri-urbanisation and its planning in Beijing.  
32 *Cities* 2013;30:68-76.
- 33 25 Shrewsbury V, Foley B, Flood V, et al. School-Level Socioeconomic Status Influences Adolescents'  
34 Health-Related Lifestyle Behaviors and Intentions. *Journal of School Health* 2018;88:583-89.
- 35 26 National Children's Medical Center; Shanghai Children's Medical Center; Shanghai Institute of  
36 Physical Education; Clinical Guidelines Development and Evaluation Center of Children's Hospital of  
37 Fudan University. Physical Activity Guidelines for Chinese Children and Adolescents. Shanghai,  
38 China, 2018.  
39 <http://www.shanghai.gov.cn/nw2/nw2314/nw2315/nw17239/nw17240/u21aw1286214.html>. Accessed  
40 6 August 2020.
- 41 27 Chinese Nutrition Society. Dietary Guidelines for Chinese School-age Children 2016; People's  
42 Medical Publishing House: Beijing, China, 2016.  
43 <http://dg.cnsoc.org/article/04/8a2389fd575f695101577a545b0102db.html>. Accessed 3 August 2020.
- 44 28 Azeredo CM, de Rezende LFM, Canella DS, et al. Dietary intake of Brazilian  
45 adolescents. *18(07):1215-24.*
- 46 29 Guthold R, Stevens GA, Riley LM, et al. Global trends in insufficient physical activity among  
47  
48  
49  
50  
51  
52  
53  
54  
55  
56  
57  
58  
59  
60

1  
2  
3 adolescents: a pooled analysis of 298 population-based surveys with 1.6 million participants. *The Lancet Child & adolescent health* 2020;4(1):23-35.

4  
5  
6 30 Chen X, Wang Y. Is ideal body image related to obesity and lifestyle behaviours in African  
7 American adolescents? *Child: care, health and development* 2012;38(2):219-28.

8  
9 31 Lim J, Dinges DF. A meta-analysis of the impact of short-term sleep deprivation on cognitive  
10 variables. *Psychological bulletin* 2010;136(3):375-89.

11 32 Rasch B, Born J. About sleep's role in memory. *Physiological reviews* 2013;93(2):681-766.

12 33 Chongqing People's Congress. Suggestions on Expansion of High-quality Education Resources in  
13 Inner Urban Cities to Peri-urban Cities. 2017. <http://www.ccpc.cq.cn/home/index/more/id/208369.html>.  
14 Accessed 14 November 2020.

15  
16 34 Littlecott HJ, Moore GF, Moore L, et al. Association between breakfast consumption and  
17 educational outcomes in 9-11-year-old children. *Public Health Nutr* 2016;19(9):1575-82.

18  
19 35 Kim HY, Frongillo EA, Han SS, et al. Academic performance of Korean children is associated with  
20 dietary behaviours and physical status. *Asia Pacific journal of clinical nutrition* 2003;12(2):186-92.

21  
22 36 Liu X, Zhao Z, Jia C, et al. Sleep patterns and problems among chinese adolescents. *Pediatrics*  
23 2008;121(6):1165-73.

24 37 Dumuid D, Olds T, Martin-Fernandez JA, et al. Academic Performance and Lifestyle Behaviors in  
25 Australian School Children: A Cluster Analysis. *Health Educ Behav* 2017;44(6):918-27.

26  
27 38 Donnelly JE, Hillman CH, Castelli D, et al. Physical Activity, Fitness, Cognitive Function, and  
28 Academic Achievement in Children: A Systematic Review. *Medicine and science in sports and  
29 exercise* 2016;48(6):1223-4.

30  
31 39 Krafft CE, Schaeffer DJ, Schwarz NF, et al. Improved frontoparietal white matter integrity in  
32 overweight children is associated with attendance at an after-school exercise program. *Developmental  
33 neuroscience* 2014;36(1):1-9.

34  
35 40 Chaddock L, Hillman CH, Pontifex MB, et al. Childhood aerobic fitness predicts cognitive  
36 performance one year later. *Journal of sports sciences* 2012;30(5):421-30.

37  
38 41 Walsh JJ, Barnes JD, Cameron JD, et al. Associations between 24 hour movement behaviours and  
39 global cognition in US children: a cross-sectional observational study. *The Lancet Child & adolescent  
40 health* 2018;2(11):783-91.

41  
42 42 Hollar D, Messiah SE, Lopez-Mitnik G, et al. Effect of a two-year obesity prevention intervention  
43 on percentile changes in body mass index and academic performance in low-income elementary school  
44 children. *American journal of public health* 2010;100(4):646-53.

45  
46 43 Donnelly JE, Hillman CH, Greene JL, et al. Physical activity and academic achievement across the  
47 curriculum: Results from a 3-year cluster-randomized trial. *Preventive Medicine* 2017;99:140-45.

48  
49 44 Syvaioja HJ, Kantomaa MT, Ahonen T, et al. Physical activity, sedentary behavior, and academic  
50 performance in Finnish children. *Medicine and science in sports and exercise* 2013;45(11):2098-104.

51  
52 45 China Health and Nutrition Survey. <https://www.cpc.unc.edu/projects/china>. Accessed 3 April 2020.

**Supplementary Table 1.** Description of questions in terms of lifestyle behaviors

| Variable          | Questions description                                                                                                                                                                                                                                                                                                                                                                                                                                                                                                                                                                                                                                                                                            |
|-------------------|------------------------------------------------------------------------------------------------------------------------------------------------------------------------------------------------------------------------------------------------------------------------------------------------------------------------------------------------------------------------------------------------------------------------------------------------------------------------------------------------------------------------------------------------------------------------------------------------------------------------------------------------------------------------------------------------------------------|
| Physical activity | <p>1) Do you participate in any physical exercises including relatively intense physical exercises, such as volleyball, soccer, and badminton before or after school each week? If “yes”, how many times do you participate in any physical exercises? On average, for how long do you participate in these physical exercises each time? (hours: minutes)</p> <p>2) Do you participate in any physical exercises including relatively intense physical exercises, such as volleyball, soccer, and badminton at school each week? If “yes”, how many times do you participate in any physical exercises? On average, for how long do you participate in these physical exercises each time? (hours: minutes)</p> |
| Sleep duration    | <p>1) How many hours each day do you usually sleep including daytime and night-time on weekdays (hours: minutes)?</p> <p>2) How many hours each day do you usually sleep including daytime and night-time on weekends (hours: minutes)?</p>                                                                                                                                                                                                                                                                                                                                                                                                                                                                      |
| Screen time       | <p>1) On average, how long is your daily screen time, such as watching TV, online videos, using a computer or smart-phone, playing video games on weekdays (hours: minutes)?</p> <p>2) On average, how long is your daily screen time, such as watching TV, online videos, using a computer or smart-phone, playing video games on weekends (hours: minutes)?</p>                                                                                                                                                                                                                                                                                                                                                |
| Dietary behaviors | <p>1) How often do you drink sugar-sweetened beverages? Response options were “every day”, “5–6 times/week”, “3–4 times/week”, “1–2 times/week”, “1–3 times/month”, “&lt;once/month”.</p> <p>2) How often do you have breakfast? Response options were “every day”, “5–6 times/week”, “3–4 times/week”, “1–2 times/month”, “never”.</p> <p>3) How often do you have lunch? Response options were “every day”, “5–6 times/week”, “3–4 times/week”, “1–2 times/month”, “never”.</p>                                                                                                                                                                                                                                |



1  
2  
3  
4 4) How often do you have dinner? Response options were “every day”, “5–6  
5 times/week”, “3–4 times/week”, “1–2 times/month”, “never”.  
6  
7

8 5) How often do you eat vegetable? Response were “>once/day”, “4–6  
9 times/week”, “2–3 times/week”, “once/week”, “<once/week”.  
10  
11

12 6) How often do you eat fruit? Response were “>once/day”, “4–6 times/week”,  
13 “2–3 times/week”, “once/week”, “<once/week”.  
14  
15

16 7) How often do you drink milk and alternatives? Response were “>once/day”,  
17 “4–6 times/week”, “2–3 times/week”, “once/week”, “<once/week”.  
18  
19

20 8) On average, how much is your daily water intake? Response options were  
21 “<800 milliliter”, “800–1100 milliliter”, “1100–1400 milliliter”, “1400–1500  
22 milliliter”, “1500–1700 milliliter”.  
23  
24

25 9) On average, how many eggs do you eat every day? Response options were  
26 “three or more per day”, “two per day”, “one per day”, “3–4/week”, “1–2/week”,  
27 “never”.  
28  
29

---

STROBE Statement—Checklist of items that should be included in reports of *cross-sectional studies*

|                              | Item No | Recommendation                                                                                                                                                                       | Page No |
|------------------------------|---------|--------------------------------------------------------------------------------------------------------------------------------------------------------------------------------------|---------|
| <b>Title and abstract</b>    | 1       | (a) Indicate the study's design with a commonly used term in the title or the abstract                                                                                               | 1       |
|                              |         | (b) Provide in the abstract an informative and balanced summary of what was done and what was found                                                                                  | 2-3     |
| <b>Introduction</b>          |         |                                                                                                                                                                                      |         |
| Background/rationale         | 2       | Explain the scientific background and rationale for the investigation being reported                                                                                                 | 4-6     |
| Objectives                   | 3       | State specific objectives, including any prespecified hypotheses                                                                                                                     | 5-6     |
| <b>Methods</b>               |         |                                                                                                                                                                                      |         |
| Study design                 | 4       | Present key elements of study design early in the paper                                                                                                                              | 6       |
| Setting                      | 5       | Describe the setting, locations, and relevant dates, including periods of recruitment, exposure, follow-up, and data collection                                                      | 6       |
| Participants                 | 6       | (a) Give the eligibility criteria, and the sources and methods of selection of participants                                                                                          | 6       |
| Variables                    | 7       | Clearly define all outcomes, exposures, predictors, potential confounders, and effect modifiers. Give diagnostic criteria, if applicable                                             | 6-8     |
| Data sources/<br>measurement | 8*      | For each variable of interest, give sources of data and details of methods of assessment (measurement). Describe comparability of assessment methods if there is more than one group | 6-8     |
| Bias                         | 9       | Describe any efforts to address potential sources of bias                                                                                                                            | 24      |
| Study size                   | 10      | Explain how the study size was arrived at                                                                                                                                            |         |
| Quantitative variables       | 11      | Explain how quantitative variables were handled in the analyses. If applicable, describe which groupings were chosen and why                                                         | 7-8     |
| Statistical methods          | 12      | (a) Describe all statistical methods, including those used to control for confounding                                                                                                | 8-9     |
|                              |         | (b) Describe any methods used to examine subgroups and interactions                                                                                                                  |         |
|                              |         | (c) Explain how missing data were addressed                                                                                                                                          |         |
|                              |         | (d) If applicable, describe analytical methods taking account of sampling strategy                                                                                                   |         |
|                              |         | (e) Describe any sensitivity analyses                                                                                                                                                |         |

1  
2  
3  
4  
5  
6  
7  
8  
9  
10  
11  
12  
13  
14  
15  
16  
17  
18  
19  
20  
21  
22  
23  
24  
25  
26  
27  
28  
29  
30  
31  
32  
33  
34  
35  
36  
37  
38  
39  
40  
41  
42  
43  
44  
45  
46  
47  
48  
49  
50  
51  
52  
53  
54  
55  
56  
57  
58  
59  
60

## Results

|                          |     |                                                                                                                                                                                                              |       |
|--------------------------|-----|--------------------------------------------------------------------------------------------------------------------------------------------------------------------------------------------------------------|-------|
| Participants             | 13* | (a) Report numbers of individuals at each stage of study—eg numbers potentially eligible, examined for eligibility, confirmed eligible, included in the study, completing follow-up, and analysed            | 9-10  |
|                          |     | (b) Give reasons for non-participation at each stage                                                                                                                                                         |       |
|                          |     | (c) Consider use of a flow diagram                                                                                                                                                                           |       |
| Descriptive data         | 14* | (a) Give characteristics of study participants (eg demographic, clinical, social) and information on exposures and potential confounders                                                                     | 9-10  |
|                          |     | (b) Indicate number of participants with missing data for each variable of interest                                                                                                                          |       |
| Outcome data             | 15* | Report numbers of outcome events or summary measures                                                                                                                                                         | 10-13 |
| Main results             | 16  | (a) Give unadjusted estimates and, if applicable, confounder-adjusted estimates and their precision (eg, 95% confidence interval). Make clear which confounders were adjusted for and why they were included | 13-19 |
|                          |     | (b) Report category boundaries when continuous variables were categorized                                                                                                                                    |       |
|                          |     | (c) If relevant, consider translating estimates of relative risk into absolute risk for a meaningful time period                                                                                             |       |
| Other analyses           | 17  | Report other analyses done—eg analyses of subgroups and interactions, and sensitivity analyses                                                                                                               |       |
| <b>Discussion</b>        |     |                                                                                                                                                                                                              |       |
| Key results              | 18  | Summarise key results with reference to study objectives                                                                                                                                                     | 20    |
| Limitations              | 19  | Discuss limitations of the study, taking into account sources of potential bias or imprecision. Discuss both direction and magnitude of any potential bias                                                   | 24    |
| Interpretation           | 20  | Give a cautious overall interpretation of results considering objectives, limitations, multiplicity of analyses, results from similar studies, and other relevant evidence                                   | 20-24 |
| Generalisability         | 21  | Discuss the generalisability (external validity) of the study results                                                                                                                                        | 23-24 |
| <b>Other information</b> |     |                                                                                                                                                                                                              |       |
| Funding                  | 22  | Give the source of funding and the role of the funders for the present study and, if applicable, for the original study on which the present article is based                                                | 25    |

1  
2  
3  
4 \*Give information separately for exposed and unexposed groups.  
5  
6  
7

8 **Note:** An Explanation and Elaboration article discusses each checklist item and gives methodological background and  
9 published examples of transparent reporting. The STROBE checklist is best used in conjunction with this article (freely  
10 available on the Web sites of PLoS Medicine at <http://www.plosmedicine.org/>, Annals of Internal Medicine at  
11 <http://www.annals.org/>, and Epidemiology at <http://www.epidem.com/>). Information on the STROBE Initiative is  
12 available at [www.strobe-statement.org](http://www.strobe-statement.org).  
13  
14  
15  
16  
17  
18  
19  
20  
21  
22  
23  
24  
25  
26  
27  
28  
29  
30  
31  
32  
33  
34  
35  
36  
37  
38  
39  
40  
41  
42  
43  
44  
45  
46  
47  
48  
49  
50  
51  
52  
53  
54  
55  
56  
57  
58  
59  
60

For peer review only

# BMJ Open

## Independent and Combined Associations between Multiple Lifestyle Behaviors and Academic Grades of Inner Urban and Peri-Urban High School Students: A Cross-Sectional Study in Chongqing, China

|                                 |                                                                                                                                                                                                                                                                                                                                                                                                                                                                                                                                                                                                                                      |
|---------------------------------|--------------------------------------------------------------------------------------------------------------------------------------------------------------------------------------------------------------------------------------------------------------------------------------------------------------------------------------------------------------------------------------------------------------------------------------------------------------------------------------------------------------------------------------------------------------------------------------------------------------------------------------|
| Journal:                        | <i>BMJ Open</i>                                                                                                                                                                                                                                                                                                                                                                                                                                                                                                                                                                                                                      |
| Manuscript ID                   | bmjopen-2021-049508.R1                                                                                                                                                                                                                                                                                                                                                                                                                                                                                                                                                                                                               |
| Article Type:                   | Original research                                                                                                                                                                                                                                                                                                                                                                                                                                                                                                                                                                                                                    |
| Date Submitted by the Author:   | 16-Aug-2021                                                                                                                                                                                                                                                                                                                                                                                                                                                                                                                                                                                                                          |
| Complete List of Authors:       | Cai, Zhengjie; Chongqing Medical University, School of Public Health and Management<br>Xian, Jin Li; Chongqing Medical University, School of Public Health and Management<br>Araujo, Camila; California University of Science and Medicine<br>Zhang, Ziwei; Chongqing Medical University, The Second Clinical College<br>Zhou, Hongyu; Chongqing Medical University, School of Public Health and Management<br>Peng, Huan; Chongqing Medical University, School of Public Health and Management<br>Sharma, Manoj; University of Nevada Las Vegas<br>Zhao, Yong; Chongqing Medical University, School of public health and management |
| <b>Primary Subject Heading</b>: | Public health                                                                                                                                                                                                                                                                                                                                                                                                                                                                                                                                                                                                                        |
| Secondary Subject Heading:      | Public health, Epidemiology                                                                                                                                                                                                                                                                                                                                                                                                                                                                                                                                                                                                          |
| Keywords:                       | Community child health < PAEDIATRICS, PUBLIC HEALTH, SOCIAL MEDICINE                                                                                                                                                                                                                                                                                                                                                                                                                                                                                                                                                                 |
|                                 |                                                                                                                                                                                                                                                                                                                                                                                                                                                                                                                                                                                                                                      |

SCHOLARONE™  
Manuscripts



I, the Submitting Author has the right to grant and does grant on behalf of all authors of the Work (as defined in the below author licence), an exclusive licence and/or a non-exclusive licence for contributions from authors who are: i) UK Crown employees; ii) where BMJ has agreed a CC-BY licence shall apply, and/or iii) in accordance with the terms applicable for US Federal Government officers or employees acting as part of their official duties; on a worldwide, perpetual, irrevocable, royalty-free basis to BMJ Publishing Group Ltd ("BMJ") its licensees and where the relevant Journal is co-owned by BMJ to the co-owners of the Journal, to publish the Work in this journal and any other BMJ products and to exploit all rights, as set out in our [licence](#).

The Submitting Author accepts and understands that any supply made under these terms is made by BMJ to the Submitting Author unless you are acting as an employee on behalf of your employer or a postgraduate student of an affiliated institution which is paying any applicable article publishing charge ("APC") for Open Access articles. Where the Submitting Author wishes to make the Work available on an Open Access basis (and intends to pay the relevant APC), the terms of reuse of such Open Access shall be governed by a Creative Commons licence – details of these licences and which [Creative Commons](#) licence will apply to this Work are set out in our licence referred to above.

Other than as permitted in any relevant BMJ Author's Self Archiving Policies, I confirm this Work has not been accepted for publication elsewhere, is not being considered for publication elsewhere and does not duplicate material already published. I confirm all authors consent to publication of this Work and authorise the granting of this licence.

1  
2  
3  
4 **1 Independent and Combined Associations between Multiple Lifestyle Behaviors**  
5  
6 **2 and Academic Grades of Inner Urban and Peri-Urban High School Students: A**  
7  
8  
9 **3 Cross-Sectional Study in Chongqing, China**

10  
11 4 Zhengjie Cai<sup>1,2,3</sup>, Jinli Xian<sup>1,2,3</sup>, Camila Araujo<sup>4</sup>, Ziwei Zhang<sup>5</sup>, Hongyu Zhou<sup>1</sup>, Huan Peng<sup>1</sup>, Manoj  
12  
13  
14 5 Sharma<sup>6</sup>, Yong Zhao<sup>1,2,3,7\*</sup>

15  
16  
17 6 <sup>1</sup>School of Public Health and Management, Chongqing Medical University, Chongqing, China

18  
19 7 <sup>2</sup>Research Center for Medicine and Social Development, Chongqing Medical University,  
20  
21  
22 8 Chongqing, China

23  
24  
25 9 <sup>3</sup>The Innovation Center for Social Risk Governance in Health, Chongqing Medical University,  
26  
27  
28 10 Chongqing, China

29  
30 11 <sup>4</sup>California University of Science and Medicine, Colton, California, USA

31  
32 12 <sup>5</sup>The Second Clinical College, Chongqing Medical University, Chongqing, China

33  
34  
35 13 <sup>6</sup>Environmental & Occupational Health, School of Public Health, University of Nevada, Las Vegas,  
36  
37  
38 14 USA

39  
40 15 <sup>7</sup>Chongqing Key Laboratory of Child Nutrition and Health, Chongqing, China

41  
42  
43 16 \*Correspondence: Yong Zhao; [zhaoyong@cqmu.edu.cn](mailto:zhaoyong@cqmu.edu.cn)

44  
45  
46 17

47  
48  
49 18

50  
51  
52 19

53  
54  
55 20

56  
57  
58 21

59  
60 22

1  
2  
3  
4 23 **Abstract**

5  
6 24 **Objectives** This study aims to assess the independent and combined associations between multiple  
7  
8  
9 25 lifestyle behaviors and academic grades of inner urban high school students (IUHSSs) and peri-  
10  
11  
12 26 urban high school students (PUHSSs).

13  
14 27 **Design** A cross-sectional study was conducted.

15  
16  
17 28 **Participants** There are 1481 high school students (49.9% boys) in this study, who were enrolled  
18  
19  
20 29 from one inner urban and two peri-urban schools in Chongqing, China.

21  
22 30 **Outcome measures** Academic grades were assessed based on the students' self-reported grade  
23  
24  
25 31 ranking in the last cumulative examination.

26  
27 32 **Results:** In IUHSSs and PUHSSs, high frequency of sugar-sweetened beverage consumption was  
28  
29  
30 33 unlikely to obtain high academic grades (OR, 0.56 [95% CI 0.32–0.99] and 0.63 [0.42–0.96],  
31  
32  
33 34 respectively). Among IUHSSs, meeting the recommendations for weekday screen time and egg  
34  
35  
35 35 consumption (1.57 [1.06–2.34] and 1.60 [1.04–2.47], respectively), and high frequency of fruit  
36  
37  
36 36 consumption (1.67 [1.11–2.50]) were significantly associated with high academic grades; meeting  
37  
38  
37 37 the recommendation for weekday sleep duration was unlikely to obtain high academic grades (0.46  
38  
39  
38 38 [0.21–0.98]). Among PUHSSs, meeting the recommendations for weekend sleep duration (1.40  
39  
40  
39 39 [1.02–1.93]) and eating dinner regularly (1.55 [1.01–2.37]) had significant associations with high  
40  
41  
40 40 academic grades. No significant associations were found between physical activity and academic  
41  
42  
41 41 grades in both IUHSSs and PUHSSs ( $p > 0.05$ ). Moreover, IUHSSs with 9–13 healthy lifestyle  
42  
43  
42 42 behaviors were 3.25 times more likely to achieve high academic grades than IUHSSs with 1–6  
43  
44  
43 43 healthy lifestyle behaviors (3.25 [1.96–5.40]). No significant associations were found in the



1  
2  
3  
4 44 combined associations between multiple lifestyle behaviors and academic grades among PUHSSs  
5  
6  
7 45 ( $p > 0.05$ ).  
8

9 46 **Conclusions:** Correlations were observed between lifestyle behaviors and academic grades among  
10  
11 47 high school students, and cumulative associations between multiple healthy lifestyle behaviors and  
12  
13  
14 48 academic outcomes appear to be stronger than the independent associations. These findings are  
15  
16  
17 49 particularly applicable to IUHSSs.  
18

19  
20 50 **Keywords:** Lifestyle behaviors; physical activity; sleep duration; screen time; dietary behaviors;  
21  
22  
23 51 academic grades; high school students; school health  
24

#### 25 26 27 52 **Strengths and limitations of this study**

- 28  
29 53 ➤ This study is novel as the independent and combined associations between multiple lifestyle  
30  
31  
32 54 behaviors and academic grades among Chinese high school students were assessed.  
33  
34 55 ➤ Study participants included inner urban and peri-urban Chinese students, the results in this  
35  
36  
37 56 study could be generalizable to other settings with economic disparities.  
38  
39 57 ➤ Self-reported data such as lifestyle behaviors and academic grades may result in social  
40  
41  
42 58 desirability bias.  
43  
44 59 ➤ Unvalidated measures in the questionnaire may raise potential issues related to reliability.  
45  
46  
47 60 ➤ The cross-sectional nature of this study limits the assessment of causality.  
48

49 61  
50 62  
51 63  
52 64  
53 65  
54 66  
55 67  
56 68  
57  
58  
59  
60

69

70 **INTRODUCTION**

71 High school is a key stage in students' transition to college, academic grades of high school students  
72 are closely related to college or university admission, even their future careers and health in  
73 adulthood.<sup>1</sup> A better understanding of modifiable factors affecting high school students' academic  
74 grades is important for public health researchers and school principals or management bodies in the  
75 high school settings.

76 Healthy lifestyles, including healthy dietary behaviors, sufficient physical activity and sleep,  
77 minimal screen time, etc., are positively associated with students' academic performance.<sup>2-4</sup> Studies  
78 examining the associations between dietary behaviors and academic achievement have typically  
79 focused on micronutrient intake,<sup>5</sup> dietary intakes,<sup>6</sup> and breakfast consumption.<sup>2-7</sup> Intake of certain  
80 micronutrients (i.e., iron), high frequency of fruit and vegetable consumption, low consumption of  
81 energy-dense and nutrient-poor food, and regular breakfast consumption all predict the likelihood  
82 of good academic grades.<sup>5-9</sup> Current studies on the association between physical activity and  
83 academic grades of children and adolescents are inconsistent. With reported evidence of exercise  
84 affecting cognition,<sup>10</sup> the positive influence of appropriate physical activities on the academic grades  
85 of children and adolescents is observed.<sup>4-11</sup> However, some studies have reported that additional or  
86 enhanced physical exercise do not show positive results in improving academic grades.<sup>12-13</sup> Previous  
87 studies investigated the correlation between poor sleep quality and reduced learning capability and  
88 poor academic grades among children and adolescents.<sup>14-15</sup> Studies on the correlation between  
89 students' screen time and their academic performance have shown that spending considerable time  
90 on television, videos or social networking sites appears to be negatively associated with academic  
91 grades.<sup>16-17</sup>

1  
2  
3  
4 92 Previous studies mainly focused on the association between a single lifestyle factor and  
5  
6 93 students' academic grades.<sup>2 3 16 18</sup> However, some scholars have proposed that the relationship  
7  
8  
9 94 between healthy lifestyle behaviors and academic performance is not isolated, and the combined  
10  
11 95 associations between multiple healthy lifestyle behaviors and academic performance may be greater  
12  
13  
14 96 than any single behavior alone.<sup>19-21</sup> Ickovics et al. found that children in grades 5–6 with higher  
15  
16  
17 97 levels of "health assets" including indicators of a healthy diet, physical activity, screen time, and  
18  
19 98 sleep, are two times higher to meet the goal of standardized exams.<sup>22</sup> Faught et al. found that grade  
20  
21  
22 99 5 students who met the recommendations for 7–9 lifestyle behaviors have higher odds of meeting  
23  
24  
25 100 the expectations for academic achievement compared with those who met three or fewer  
26  
27  
28 101 recommendations.<sup>23</sup> With the social, cultural, and educational context of China, the heavy burden  
29  
30 102 of study for Chinese high school students is so common, and maintaining a healthy lifestyle could  
31  
32  
33 103 be ignored. However, having a healthy lifestyle is one of the most important modifiable factors for  
34  
35 104 students' academic grades. Given the importance of academic grades for high school students, the  
36  
37  
38 105 independent and combined associations between lifestyle behaviors and academic grades targeting  
39  
40  
41 106 this population need to be investigated.

42  
43 107 Previous studies have demonstrated that there were some factors related to students' academic  
44  
45 108 grades, lifestyle behaviors or both.<sup>9 23-28</sup> Faught et al. found that girls had a stronger association with  
46  
47  
48 109 the likelihood of meeting expectations for academic achievement in reading and writing than boys,  
49  
50  
51 110 and the area of residence was associated with students' academic achievement in mathematics.<sup>23</sup>  
52  
53  
54 111 Some researchers found that students with higher parental education levels were more likely to  
55  
56 112 obtain better academic achievement.<sup>9 23</sup> Li's research showed that boarding school students were  
57  
58  
59 113 more likely to obtain better academic grades than those students who did not board at school.<sup>26</sup> In  
60

1  
2  
3  
4 114 addition, Pan et al. found that students' monthly living expenses were negatively correlated with  
5  
6 115 academic performance, also, whether the student was an only child influenced academic  
7  
8  
9 116 performance.<sup>27</sup> These factors were also the possible influencing factors of students' lifestyle  
10  
11 117 behaviors.<sup>23-25 28</sup> Therefore, the above factors were adjusted as potential confounders in this study.

12  
13  
14 118 In the context of metropolitan China, "urban" refers to inner urban and peri-urban areas. Peri-  
15  
16  
17 119 urbanization refers to the dispersal of urban growth toward the rural surroundings of cities (urban  
18  
19 120 sprawl), thereby creating landscapes that are characterized by urban and rural social and economic  
20  
21  
22 121 activities.<sup>29</sup> Inner urban districts have higher socioeconomic levels than peri-urban districts in  
23  
24 122 Chongqing, China.<sup>30</sup> The lifestyle of students differs across various socioeconomic school levels<sup>31</sup>  
25  
26  
27 123 and is likely to have different influences on the students' academic grades.

28  
29  
30 124 To the best of our knowledge, limited studies have investigated the combined associations  
31  
32 125 between lifestyle behaviors and students' academic grades. Hence, this study aims to (1) explore  
33  
34  
35 126 the individual associations between multiple lifestyle behaviors (physical activity before or after  
36  
37 127 school or on weekends, physical activity at school, sleep duration on weekdays and weekends,  
38  
39  
40 128 screen time on weekdays and weekends, consumption frequency of sugar-sweetened beverages  
41  
42  
43 129 (SSBs), breakfast, lunch, dinner, vegetables, fruit, milk and milk alternatives, and the quantity of  
44  
45  
46 130 water and egg consumption) and academic grades among inner urban high school students (IUHSSs)  
47  
48 131 and peri-urban high school students (PUHSSs) in grades 10 and 11 in Chongqing, China, and (2)  
49  
50  
51 132 explore the combined associations between multiple lifestyle behaviors and academic grades in  
52  
53 133 IUHSSs and PUHSSs. This study is expected to effectively promote multiple healthy lifestyle  
54  
55  
56 134 behaviors among high school students from areas with different economic levels and obtain a better  
57  
58  
59 135 understanding of the independent and combined associations between multiple lifestyle behaviors  
60

1  
2  
3  
4 136 and academic grades of high school students.  
5

## 6 137 **METHODS**

### 9 138 **Study design and study sample**

10  
11 139 A cross-sectional survey was conducted in Chongqing among 1481 high school students. Chongqing  
12  
13  
14 140 is a municipality in midwestern China with 26 districts, including nine inner urban districts and 17  
15  
16  
17 141 peri-urban districts. One inner urban (Jiangbei) and two peri-urban districts (Dazu and Kaizhou)  
18  
19  
20 142 were randomly chosen in Chongqing, and one high school was randomly selected from each  
21  
22  
23 143 designated district. Six to twelve classes were randomly selected from each school, and all students  
24  
25  
26 144 in the selected classes were invited to participate in this study. High school students in grades 10  
27  
28 145 and 11 were eligible to participate in this study. Students who have a history of major diseases,  
29  
30 146 chronic health conditions, or mental trauma were excluded in this study. Investigators explained the  
31  
32  
33 147 research and distributed the questionnaire to all students, and students promptly completed the  
34  
35  
36 148 anonymous questionnaire independently.

37  
38 149 According to the research of Yan et al.,<sup>32</sup> nearly 48% of middle-school and high-school  
39  
40 150 students reported having good grade rankings in their final examination. According to the sample  
41  
42  
43 151 size calculation formula of the cross-sectional study  $N = (Z_{\alpha}^2 \times p \times q) / d^2$ , we set  $p = 0.48$ ,  $q =$   
44  
45  
46 152  $1 - p = 0.52$ , and margin of error  $d = 0.10 \times p = 0.048$ ,  $Z_{\alpha} = 1.96$ , the calculated sample size was  
47  
48 153 416. In the survey, the actual total sample size included 1481 individuals.

### 50 154 **Patient and public involvement**

51  
52  
53 155 Patients or the public were not involved in the design, or conduct, or reporting, or dissemination  
54  
55  
56 156 plans of our research

### 57 58 157 **Exposure**

1  
2  
3  
4 158 The descriptions of fifteen questions in terms of lifestyle behaviors (physical activity, sleep duration,  
5  
6 159 screen time, and dietary behaviors) are presented in Supplementary Table 1. Healthy lifestyle  
7  
8  
9 160 behaviors were assessed based on the recommended guidelines or previous studies. High school  
10  
11 161 students who engage in moderate-to-high-intensity physical activity for more than 1 h a day and  
12  
13  
14 162 whose screen time is less than 2 h a day meet the physical activity guidelines for Chinese children  
15  
16  
17 163 and adolescents.<sup>33</sup> Physical activity was categorized into  $\geq 1$  h and  $< 1$  h, and daily screen time was  
18  
19 164 categorized into  $\geq 2$  h and  $< 2$  h. Insufficient sleep was defined as less than 8 h a day for high school  
20  
21  
22 165 students, as recommended by the Chinese Dietary Guideline 2016.<sup>34</sup> Sleep duration was categorized  
23  
24  
25 166 into  $\geq 8$  h and  $< 8$  h. In terms of dietary behaviors, participants were asked about the consumption  
26  
27 167 frequency of SSBs, breakfast, lunch, dinner, vegetables, fruit, milk and milk alternatives, and the  
28  
29  
30 168 quantity of water and egg consumption. As recommended by the Chinese Dietary Guideline 2016,<sup>34</sup>  
31  
32  
33 169 water and egg consumption were divided into two categories, namely, meeting the guideline and  
34  
35  
36 170 not meeting the guideline. Consumption of SSBs less than once a week, consumption of breakfast,  
37  
38 171 lunch and dinner five or more times per week, and consumption of vegetables, fruit, and milk and  
39  
40 172 milk alternatives more than once per day were considered as healthy dietary behaviors.<sup>35-37</sup>

### 43 173 **Outcome**

44  
45 174 Academic grades were approximately assessed based on the students' self-reported ranking in the  
46  
47  
48 175 last cumulative examination in their grades, with the options being the top 25%, 25–50%, 50–75%  
49  
50  
51 176 and lowest 25%. With reference to previous studies,<sup>4 32</sup> academic grades were dichotomized into  
52  
53 177 good (top 50%) and poor (last 50%) for statistical analyses.

### 56 178 **Potential confounders**

57  
58 179 Analyses were adjusted in terms of school areas, age, gender (male/female), residence (urban/rural),  
59  
60

1  
2  
3  
4 180 being an only child in the family (yes/no), boarding school (yes/no), average monthly living  
5  
6 181 expenses (low:  $\leq 800$  RMB, medium: 801–1200 RMB, and high:  $>1200$  RMB), and parental  
7  
8  
9 182 education level (low: primary school or below, medium: secondary school/secondary vocational  
10  
11  
12 183 school/high school, and high: college or above).

#### 14 184 **Statistical analyses**

15  
16  
17 185 All analyses were performed with the Statistical Package for Social Sciences (SPSS) software  
18  
19 186 version 21 (IBM Corporation, Chicago, IL, USA). Invalid or missing data were excluded, and all  
20  
21  
22 187 data were double-checked. The categorical variables were described using frequency and percentiles,  
23  
24  
25 188 and owing to the non-normal distribution of age, we described age using median and Inter-Quartile  
26  
27 189 Range (IQR). Chi-square tests were conducted to examine the differences in lifestyle behaviors  
28  
29  
30 190 between IUHSSs and PUHSSs. The independent and combined associations between multiple  
31  
32  
33 191 lifestyle behaviors and academic grades were assessed through multivariate logistic regressions.  
34  
35 192 Odds ratios (ORs) and their corresponding 95% confidence intervals (95% CI) were reported. An  
36  
37  
38 193 unadjusted logistic regression was used to assess the independent associations between multiple  
39  
40  
41 194 lifestyle behaviors and academic grades in all students, IUHSSs and PUHSSs, respectively. In all  
42  
43  
44 195 students, the adjusted model reported the results of multivariate regression analysis after adjusting  
45  
46 196 the potential confounders (school area, age, gender, residence, being an only child, boarding at the  
47  
48 197 school, average monthly living expenses, and parental education level) and all lifestyle behaviors.  
49  
50  
51 198 In IUHSSs and PUHSSs, the adjusted model reported the results of multivariate regression analysis  
52  
53  
54 199 after adjusting age, gender, residence, being an only child, boarding at the school, average monthly  
55  
56 200 living expenses, and parental education level and all lifestyle behaviors respectively. The effect of  
57  
58  
59 201 the number of healthy lifestyle behaviors was considered to assess the combined associations  
60

202 between multiple lifestyle behaviors and academic grades. The total number of healthy lifestyle  
 203 behaviors ranged from 1 to 13, and three categories of healthy lifestyle behaviors were constructed  
 204 in accordance with the frequency distribution of the number of healthy lifestyle behaviors: low (1–  
 205 6 healthy lifestyle behaviors, 40.0%), medium (7–8 healthy lifestyle behaviors, 38.8%), and high  
 206 (9–13 healthy lifestyle behaviors, 21.2%). Treating the number of healthy lifestyle behaviors as both  
 207 categorical and continuous variables, univariable and multivariable regression models were used to  
 208 assess the cumulative associations between multiple lifestyle behaviors and academic grades.  $p <$   
 209 0.05 (two-sided) was considered as statistical significance.

## 210 RESULTS

### 211 Sample characteristics

212 Table 1 shows the sample characteristics of participants. IUHSSs comprised 45.8% out of 1481 high  
 213 school students (49.9% boys). The median age is 16.0. Among the students, 64.6% lived in the city,  
 214 64.5% had siblings, and 58.0% were boarding school. More than half (58.1%) of the students'  
 215 average monthly living expenses were less than 800 RMB. More than half of the parental education  
 216 level were medium (56.2% and 54.6%, respectively). And 63.8% of the students' academic grades  
 217 were ranked as top 50%.

218 **Table 1** Demographic characteristics of participants (n = 1481)

| Variables          |             | n (%) or Mean $\pm$ SD |
|--------------------|-------------|------------------------|
| School areas       | Inner urban | 678 (45.8)             |
|                    | Peri-urban  | 803 (54.2)             |
| Age (Median (IQR)) |             | 16.0 (1.0)             |
| Gender             | Boy         | 739 (49.9)             |



|                                       |          |            |
|---------------------------------------|----------|------------|
|                                       | Girl     | 742 (50.1) |
| Residence                             | City     | 957 (64.6) |
|                                       | Village  | 524 (35.4) |
| Only-child status                     | Yes      | 525 (35.5) |
|                                       | No       | 956 (64.5) |
| Boarding school                       | Yes      | 859 (58.0) |
|                                       | No       | 622 (42.0) |
| Average monthly living expenses (RMB) | Low      | 861 (58.1) |
|                                       | Medium   | 465 (31.4) |
|                                       | High     | 155 (10.5) |
| Father's educational level            | Low      | 163 (11.0) |
|                                       | Medium   | 832 (56.2) |
|                                       | High     | 486 (32.8) |
| Mother's educational level            | Low      | 278 (18.8) |
|                                       | Medium   | 808 (54.6) |
|                                       | High     | 395 (26.6) |
| Academic grades                       | Top 50%  | 945 (63.8) |
|                                       | Last 50% | 536 (36.2) |

---

## 219 Lifestyle behaviors of participants

220 Table 2 shows the comparison of lifestyle behaviors between IUHSSs and PUHSSs. The  
 221 percentages of students meeting the recommendations of lifestyle behaviors were: 5.6% and 19.5%  
 222 for daily physical activity before or after school or on weekends and at school, respectively; 10.8%

223 and 70.5% for daily sleep duration on weekdays and on weekends, respectively; 81.4% and 18.4%  
 224 for daily screen time on weekdays and on weekends, respectively; and 18.5% and 23.0% for water  
 225 and egg consumption, respectively. And 27.3% of the students drank SSBs less than once a week.  
 226 Breakfast, lunch and dinner consumption five times or more per week were 83.8%, 96.2%, and  
 227 79.1%, respectively. Vegetable, fruit and milk and milk alternatives consumption more than once  
 228 per day were 79.1%, 42.4% and 42.7%, respectively. All lifestyle behaviors varied between IUHSSs  
 229 and PUHSSs except for physical activity at school, frequency of breakfast, dinner and vegetable  
 230 intake, and water and egg consumption ( $p < 0.05$ ).

231 **Table 2** The comparison of lifestyles behaviors of students between inner urban and peri-urban high  
 232 schools in Chongqing, China (n = 1481)

| Variables                                               | Total population | Inner urban<br>(n = 678) | Peri-urban<br>(n = 803) | $\chi^2$ | P      |
|---------------------------------------------------------|------------------|--------------------------|-------------------------|----------|--------|
| Physical activity before or after school or on weekends |                  |                          |                         |          |        |
| <1 h                                                    | 1,398 (94.4)     | 631 (93.1)               | 767 (95.5)              | 4.17     | 0.04   |
| $\geq 1$ h                                              | 83 (5.6)         | 47 (6.9)                 | 36 (4.5)                |          |        |
| Physical activity at school                             |                  |                          |                         |          |        |
| <1 h                                                    | 1,192 (80.5)     | 547 (80.7)               | 645 (80.3)              | 0.03     | 0.86   |
| $\geq 1$ h                                              | 289 (19.5)       | 131 (19.3)               | 158 (19.7)              |          |        |
| Sleep time on weekdays                                  |                  |                          |                         |          |        |
| <8 h                                                    | 1,321 (89.2)     | 643 (94.8)               | 678 (84.4)              | 41.30    | <0.001 |
| $\geq 8$ h                                              | 160 (10.8)       | 35 (5.2)                 | 125 (15.6)              |          |        |
| Sleep time on weekends                                  |                  |                          |                         |          |        |

|                           |              |            |            |       |        |
|---------------------------|--------------|------------|------------|-------|--------|
| <8 h                      | 437 (29.5)   | 171 (25.2) | 266 (33.1) | 11.04 | <0.001 |
| ≥8 h                      | 1044 (70.5)  | 507 (74.8) | 537 (66.9) |       |        |
| Screen time on weekdays   |              |            |            |       |        |
| ≥2 h                      | 276 (18.6)   | 157 (23.2) | 119 (14.8) | 16.85 | <0.001 |
| <2 h                      | 1,205 (81.4) | 521 (76.8) | 684 (85.2) |       |        |
| Screen time on weekends   |              |            |            |       |        |
| ≥2 h                      | 1,208 (81.6) | 581 (85.7) | 627 (78.1) | 14.16 | <0.001 |
| <2 h                      | 273 (18.4)   | 97 (14.3)  | 176 (21.9) |       |        |
| Sugar-sweetened beverages |              |            |            |       |        |
| ≥5 times/week             | 343 (23.2)   | 174 (25.7) | 169 (21.1) | 51.30 | <0.001 |
| 3-4 times/week            | 333 (22.5)   | 169 (24.9) | 164 (20.4) |       |        |
| 1-2 times/week            | 401 (27.1)   | 211 (31.1) | 190 (23.6) |       |        |
| <once/week                | 404 (27.3)   | 124 (18.3) | 280 (34.9) |       |        |
| Breakfast                 |              |            |            |       |        |
| <5 times/week             | 240 (16.2)   | 110 (16.2) | 130 (16.2) | 0.00  | 0.99   |
| ≥5 times/week             | 1,241 (83.8) | 568 (83.8) | 673 (83.8) |       |        |
| Lunch                     |              |            |            |       |        |
| <5 times/week             | 56 (3.8)     | 14 (2.1)   | 42 (5.2)   | 10.12 | 0.001  |
| ≥5 times/week             | 1,425 (96.2) | 664 (97.9) | 761 (94.8) |       |        |
| Dinner                    |              |            |            |       |        |
| <5 times/week             | 309 (20.9)   | 155 (22.9) | 154 (19.2) | 3.02  | 0.08   |
| ≥5 times/week             | 1,172 (79.1) | 523 (77.1) | 649 (80.8) |       |        |

|    |                                     |              |            |            |        |        |
|----|-------------------------------------|--------------|------------|------------|--------|--------|
| 1  |                                     |              |            |            |        |        |
| 2  |                                     |              |            |            |        |        |
| 3  |                                     |              |            |            |        |        |
| 4  | Vegetables                          |              |            |            |        |        |
| 5  |                                     |              |            |            |        |        |
| 6  | <once/day                           | 310 (20.9)   | 156 (23.0) | 154 (19.2) | 3.26   | 0.07   |
| 7  |                                     |              |            |            |        |        |
| 8  |                                     |              |            |            |        |        |
| 9  | ≥once/day                           | 1,171 (79.1) | 522 (77.0) | 649 (80.8) |        |        |
| 10 |                                     |              |            |            |        |        |
| 11 | Fruit                               |              |            |            |        |        |
| 12 |                                     |              |            |            |        |        |
| 13 |                                     |              |            |            |        |        |
| 14 | <once/day                           | 853 (57.6)   | 349 (51.5) | 504 (62.8) | 19.18  | <0.001 |
| 15 |                                     |              |            |            |        |        |
| 16 |                                     |              |            |            |        |        |
| 17 | ≥once/day                           | 628 (42.4)   | 329 (48.5) | 299 (37.2) |        |        |
| 18 |                                     |              |            |            |        |        |
| 19 | Milk and milk alternatives          |              |            |            |        |        |
| 20 |                                     |              |            |            |        |        |
| 21 |                                     |              |            |            |        |        |
| 22 | <once/day                           | 849 (57.3)   | 290 (42.8) | 559 (69.6) | 108.26 | <0.001 |
| 23 |                                     |              |            |            |        |        |
| 24 |                                     |              |            |            |        |        |
| 25 | ≥once/day                           | 632 (42.7)   | 388 (57.2) | 244 (30.4) |        |        |
| 26 |                                     |              |            |            |        |        |
| 27 | Meeting water intake recommendation |              |            |            |        |        |
| 28 |                                     |              |            |            |        |        |
| 29 |                                     |              |            |            |        |        |
| 30 | No                                  | 1,207 (81.5) | 544 (80.2) | 663 (82.6) | 1.32   | 0.25   |
| 31 |                                     |              |            |            |        |        |
| 32 | Yes                                 | 274 (18.5)   | 134 (19.8) | 140 (17.4) |        |        |
| 33 |                                     |              |            |            |        |        |
| 34 |                                     |              |            |            |        |        |
| 35 | Meeting egg intake recommendation   |              |            |            |        |        |
| 36 |                                     |              |            |            |        |        |
| 37 |                                     |              |            |            |        |        |
| 38 | No                                  | 1,141 (77.0) | 508 (74.9) | 633 (78.8) | 3.17   | 0.08   |
| 39 |                                     |              |            |            |        |        |
| 40 | Yes                                 | 340 (23.0)   | 170 (25.1) | 170 (21.2) |        |        |
| 41 |                                     |              |            |            |        |        |

233 **Logistic regression for identifying the independent and combined associations of multiple**

234 **lifestyle behaviors and academic grades among IUHSSs and PUHSSs**

235 The results of the logistic regression analysis for identifying the independent associations between

236 multiple lifestyle behaviors and academic grades are shown in Table 3.

237 In the adjusted model, among all students, students who met the recommendations for sleep

238 duration on weekends (OR = 1.39, 95% CI [1.10–1.77]) and eating dinner regularly (≥5 times/week

239 vs. <5 times/week: OR = 1.47, 95% CI [1.11–1.95]) were significantly correlated with high

1  
2  
3  
4 240 academic grades; students with high frequency of SSBs consumption ( $\geq 5$  times/week vs.  
5  
6 241  $< \text{once/week}$ : OR = 0.66, 95% CI [0.48–0.92]) were unlikely to obtain high academic grades.

7  
8  
9 242 In the adjusted model, among IUHSSs, meeting the recommendations for screen time on  
10  
11 243 weekdays (OR = 1.57, 95% CI [1.06–2.34]) and daily egg consumption (OR = 1.60, 95% CI [1.04–  
12  
13 244 2.47]), and high frequency of fruit consumption ( $\geq \text{once/week}$  vs.  $< \text{once/week}$ : OR = 1.67, 95% CI  
14  
15 245 [1.11–2.50]) were still significantly correlated with high academic grades; students who met the  
16  
17 246 recommendations for sleep duration on weekdays (OR = 0.46, 95% CI [0.21–0.98]) and high  
18  
19 247 frequency of SSBs consumption ( $\geq 5$  times/week vs.  $< \text{once/week}$ : OR = 0.56, 95% CI [0.32–0.99])  
20  
21 248 were unlikely to obtain high academic grades. Among PUHSSs, meeting the recommendations for  
22  
23 249 sleep duration on weekends (OR = 1.40, 95% CI [1.02–1.93]) and eating dinner regularly ( $\geq 5$   
24  
25 250 times/week vs.  $< 5$  times/week: OR = 1.55, 95% CI [1.01–2.37]) were significantly correlated with  
26  
27 251 high academic grades; students with high frequency of SSBs consumption (3–4 times/week vs.  
28  
29 252  $< \text{once/week}$ : OR = 0.63, 95% CI [0.42–0.96]) were unlikely to obtain high academic grades.

30  
31  
32 253 The results of the logistic regression analysis for identifying the combined associations between  
33  
34 254 multiple lifestyle behaviors and academic grades are shown in Table 4. In the adjusted model, the  
35  
36 255 number of healthy lifestyle behaviors in all students was positively associated with academic grades  
37  
38 256 (OR = 1.12, 95% CI [1.05–1.19]), and students who had 9–13 healthy lifestyle behaviors were more  
39  
40 257 likely to obtain high academic grades than those who had 1–6 healthy lifestyle behaviors (OR =  
41  
42 258 1.74, 95% CI [1.28–2.37]).

43  
44  
45 259 In the adjusted model, the number of healthy lifestyle behaviors among IUHSSs was positively  
46  
47 260 associated with academic grades (OR = 1.23, 95% CI [1.11–1.35]). And IUHSSs who had 7–8  
48  
49 261 healthy lifestyle behaviors were more likely to obtain high academic grades than those who had 1–  
50  
51  
52  
53  
54  
55  
56  
57  
58  
59  
60

1  
2  
3  
4 262 6 healthy lifestyle behaviors (OR = 1.54, 95% CI [1.06–2.24]), IUHSSs who had 9–13 healthy  
5  
6 263 lifestyle behaviors had 3.25 times higher odds of obtaining high academic grades than those who  
7  
8  
9 264 had 1–6 healthy lifestyle behaviors (OR = 3.25, 95% CI [1.96–5.40]). No combined association was  
10  
11 265 found between lifestyle behaviors and academic grades among PUHSSs ( $p > 0.05$ ).  
12  
13  
14  
15  
16  
17  
18  
19  
20  
21  
22  
23  
24  
25  
26  
27  
28  
29  
30  
31  
32  
33  
34  
35  
36  
37  
38  
39  
40  
41  
42  
43  
44  
45  
46  
47  
48  
49  
50  
51  
52  
53  
54  
55  
56  
57  
58  
59  
60

For peer review only

266 **Table 3** Logistic regression for identifying the independent associations between multiple lifestyle behaviors and academic grades among inner urban and peri-urban high school students in  
 267 Chongqing, China (n = 1481)

| Variables                                               | Total population (n = 1481) |              |                         |             | Inner urban high school students (n = 678) |             |                         |             | Peri-urban high school students (n = 803) |             |                         |             |
|---------------------------------------------------------|-----------------------------|--------------|-------------------------|-------------|--------------------------------------------|-------------|-------------------------|-------------|-------------------------------------------|-------------|-------------------------|-------------|
|                                                         | Unadjusted                  |              | Adjusted <sup>a</sup>   |             | Unadjusted                                 |             | Adjusted <sup>b</sup>   |             | Unadjusted                                |             | Adjusted <sup>b</sup>   |             |
|                                                         | OR (95% CI)                 | p            | OR (95% CI)             | p           | OR (95% CI)                                | p           | OR (95% CI)             | p           | OR (95% CI)                               | p           | OR (95% CI)             | p           |
| Physical activity before or after school or on weekends |                             |              |                         |             |                                            |             |                         |             |                                           |             |                         |             |
| ≥1 h vs. <1 h                                           | 0.77 (0.49–1.20)            | 0.25         | 0.83 (0.51–1.36)        | 0.46        | 1.00 (0.53–1.88)                           | 0.99        | 1.50 (0.72–3.15)        | 0.28        | 0.51 (0.26, 1.01)                         | 0.05        | 0.57 (0.27–1.18)        | 0.13        |
| Physical activity at school                             |                             |              |                         |             |                                            |             |                         |             |                                           |             |                         |             |
| ≥1 h vs. <1 h                                           | 0.81 (0.62–1.06)            | 0.12         | 0.84 (0.63–1.11)        | 0.22        | 0.74 (0.49–1.09)                           | 0.13        | 0.77 (0.48–1.23)        | 0.27        | 0.88 (0.62–1.25)                          | 0.46        | 0.98 (0.66–1.44)        | 0.91        |
| Sleep duration on weekdays                              |                             |              |                         |             |                                            |             |                         |             |                                           |             |                         |             |
| ≥8h vs. <8h                                             | 1.06 (0.75–1.49)            | 0.74         | 1.01 (0.70–1.45)        | 0.96        | <b>0.47 (0.24–0.94)</b>                    | <b>0.03</b> | <b>0.46 (0.21–0.98)</b> | <b>0.04</b> | <b>1.56 (1.04–2.35)</b>                   | <b>0.03</b> | 1.41 (0.92–2.18)        | 0.12        |
| Sleep duration on weekends                              |                             |              |                         |             |                                            |             |                         |             |                                           |             |                         |             |
| ≥8h vs. <8h                                             | <b>1.43 (1.14–1.80)</b>     | <b>0.002</b> | <b>1.39 (1.10–1.77)</b> | <b>0.01</b> | 1.35 (0.94–1.94)                           | 0.11        | 1.38 (0.93–2.05)        | 0.11        | <b>1.42 (1.05–1.91)</b>                   | <b>0.02</b> | <b>1.40 (1.02–1.93)</b> | <b>0.04</b> |

1  
2  
3  
4  
5  
6  
7  
8  
9  
10  
11  
12  
13  
14  
15  
16  
17  
18  
19  
20  
21  
22  
23  
24  
25  
26  
27  
28  
29  
30  
31  
32  
33  
34  
35  
36  
37  
38  
39  
40  
41  
42  
43  
44  
45  
46

---

|                                 |                  |      |                         |             |                         |              |                         |              |                         |             |                         |             |  |
|---------------------------------|------------------|------|-------------------------|-------------|-------------------------|--------------|-------------------------|--------------|-------------------------|-------------|-------------------------|-------------|--|
| Screen time on weekdays         |                  |      |                         |             |                         |              |                         |              |                         |             |                         |             |  |
| <2h vs. ≥2h                     | 1.21 (0.93–1.58) | 0.16 | 1.20 (0.90–1.59)        | 0.21        | <b>1.73 (1.20–2.51)</b> | <b>0.004</b> | <b>1.57 (1.06–2.34)</b> | <b>0.02</b>  | 0.90 (0.61–1.35)        | 0.63        | 0.89 (0.58–1.36)        | 0.59        |  |
| Screen time on weekends         |                  |      |                         |             |                         |              |                         |              |                         |             |                         |             |  |
| <2h vs. ≥2h                     | 0.89 (0.68–1.16) | 0.39 | 0.85 (0.64–1.59)        | 0.21        | 1.41 (0.87–2.29)        | 0.17         | 1.15 (0.68–1.96)        | 0.60         | 0.74 (0.53–1.04)        | 0.09        | 0.74 (0.51–1.08)        | 0.12        |  |
| Sugar-sweetened beverages       |                  |      |                         |             |                         |              |                         |              |                         |             |                         |             |  |
| ≥5 times/week vs. <once/week    | 0.74 (0.55–1.00) | 0.05 | <b>0.66 (0.48–0.92)</b> | <b>0.02</b> | <b>0.46 (0.28–0.77)</b> | <b>0.003</b> | <b>0.56 (0.32–0.99)</b> | <b>0.049</b> | 0.93 (0.62–1.37)        | 0.70        | 0.99 (0.64–1.55)        | 0.98        |  |
| 3–4 times/week vs. <once/week   | 0.84 (0.62–1.14) | 0.27 | 0.74 (0.54–1.02)        | 0.07        | 0.88 (0.52–1.50)        | 0.64         | 1.06 (0.60–1.90)        | 0.83         | <b>0.65 (0.44–0.97)</b> | <b>0.03</b> | <b>0.63 (0.42–0.96)</b> | <b>0.03</b> |  |
| 1–2 times/week vs. <once a week | 0.81 (0.61–1.09) | 0.16 | 0.74 (0.54–1.00)        | 0.05        | 0.64 (0.39–1.06)        | 0.08         | 0.78 (0.45–1.33)        | 0.36         | 0.79 (0.54–1.16)        | 0.23        | 0.81 (0.54–1.21)        | 0.30        |  |
| Breakfast                       |                  |      |                         |             |                         |              |                         |              |                         |             |                         |             |  |
| ≥5 times/week vs. <5 times/week | 1.27 (0.95–1.68) | 0.10 | 1.07 (0.79–1.45)        | 0.65        | 1.40 (0.92–2.14)        | 0.12         | 1.08 (0.67–1.77)        | 0.75         | 1.17 (0.80–1.71)        | 0.41        | 1.05 (0.70–1.59)        | 0.81        |  |
| Lunch                           |                  |      |                         |             |                         |              |                         |              |                         |             |                         |             |  |
| ≥5 times/week vs. <5 times/week | 1.34 (0.78–2.30) | 0.29 | 1.00 (0.56–1.79)        | 1.00        | 0.85 (0.26–2.75)        | 0.79         | 0.59 (0.17–2.08)        | 0.41         | 1.40 (0.75–2.60)        | 0.29        | 1.16 (0.58–2.32)        | 0.68        |  |
| Dinner                          |                  |      |                         |             |                         |              |                         |              |                         |             |                         |             |  |

---



|                                          |                         |             |                         |             |                         |             |                         |             |                  |      |                         |             |
|------------------------------------------|-------------------------|-------------|-------------------------|-------------|-------------------------|-------------|-------------------------|-------------|------------------|------|-------------------------|-------------|
| ≥5 times/week vs. <5 times/week          | <b>1.42 (1.10–1.83)</b> | <b>0.01</b> | <b>1.47 (1.11–1.95)</b> | <b>0.01</b> | <b>1.49 (1.02–2.16)</b> | <b>0.04</b> | 1.48 (0.98–2.24)        | 0.06        | 1.42 (1.00–2.02) | 0.05 | <b>1.55 (1.01–2.37)</b> | <b>0.04</b> |
| Vegetables                               |                         |             |                         |             |                         |             |                         |             |                  |      |                         |             |
| ≥once a day vs. <once a day              | 0.88 (0.68–1.14)        | 0.34        | 0.84 (0.63–1.12)        | 0.23        | 1.09 (0.75–1.60)        | 0.65        | 0.88 (0.57–1.35)        | 0.56        | 0.75 (0.52–1.08) | 0.13 | 0.74 (0.49–1.10)        | 0.14        |
| Fruit                                    |                         |             |                         |             |                         |             |                         |             |                  |      |                         |             |
| ≥once a day vs. <once a day              | 1.17 (0.95–1.46)        | 0.15        | 1.19 (0.92–1.53)        | 0.19        | <b>1.46 (1.05–2.02)</b> | <b>0.02</b> | <b>1.67 (1.11–2.50)</b> | <b>0.01</b> | 0.92 (0.69–1.23) | 0.57 | 0.94 (0.67–1.33)        | 0.74        |
| Milk and milk alternatives               |                         |             |                         |             |                         |             |                         |             |                  |      |                         |             |
| ≥once a day vs. <once a day              | 1.31 (1.06–1.63)        | 0.01        | 1.22 (0.95–1.56)        | 0.12        | <b>1.50 (1.08–2.07)</b> | <b>0.01</b> | 1.19 (0.82–1.74)        | 0.35        | 1.01 (0.74–1.37) | 0.97 | 1.01 (0.70–1.45)        | 0.97        |
| Meeting water consumption recommendation |                         |             |                         |             |                         |             |                         |             |                  |      |                         |             |
| Yes vs. no                               | 1.17 (0.89–1.55)        | 0.26        | 1.20 (0.90–1.60)        | 0.21        | 1.48 (0.96–2.27)        | 0.07        | 1.42 (0.90–2.26)        | 0.14        | 0.96 (0.66–1.39) | 0.82 | 1.05 (0.71–1.55)        | 0.82        |
| Meeting egg consumption recommendation   |                         |             |                         |             |                         |             |                         |             |                  |      |                         |             |
| Yes vs. no                               | 1.29 (1.00–1.67)        | 0.05        | 1.22 (0.93–1.61)        | 0.15        | <b>1.59 (1.07–2.35)</b> | <b>0.02</b> | <b>1.60 (1.04–2.47)</b> | <b>0.03</b> | 1.06 (0.75–1.49) | 0.76 | 1.03 (0.71–1.49)        | 0.87        |

268 <sup>a</sup> Adjusted for school area, age, gender, residence, only-child status in the family, boarding school, average monthly living expenses, parental education level and all lifestyle behaviors

269 <sup>b</sup> Adjusted for age, gender, residence, only-child status in the family, boarding school, average monthly living expenses, parental education level and all lifestyle behaviors

270 Results in bold are statistically significant ( $p < 0.05$ )

271 **Table 4** Logistic regression for identifying the combined associations between multiple lifestyle behaviors and academic grades

| Variables                                          | Total population (n = 1481) |              |                         |                  | Inner urban high school students (n = 678) |                  |                         |                  | Peri-urban high school students (n = 803) |      |                       |      |
|----------------------------------------------------|-----------------------------|--------------|-------------------------|------------------|--------------------------------------------|------------------|-------------------------|------------------|-------------------------------------------|------|-----------------------|------|
|                                                    | Unadjusted                  |              | Adjusted <sup>a</sup>   |                  | Unadjusted                                 |                  | Adjusted <sup>b</sup>   |                  | Unadjusted                                |      | Adjusted <sup>b</sup> |      |
|                                                    | OR (95% CI)                 | p            | OR (95% CI)             | P                | OR (95% CI)                                | p                | OR (95% CI)             | p                | OR (95% CI)                               | p    | OR (95% CI)           | p    |
| Multiple healthy lifestyle behaviors <sup>c</sup>  | <b>1.11 (1.04–1.17)</b>     | <b>0.001</b> | <b>1.12 (1.05–1.19)</b> | <b>&lt;0.001</b> | <b>1.22 (1.11–1.33)</b>                    | <b>&lt;0.001</b> | <b>1.23 (1.11–1.35)</b> | <b>&lt;0.001</b> | 1.03 (0.96–1.11)                          | 0.42 | 1.03 (0.95–1.12)      | 0.45 |
| Categories of multiple healthy lifestyle behaviors |                             |              |                         |                  |                                            |                  |                         |                  |                                           |      |                       |      |
| Low (1–6)                                          | Ref                         |              | Ref                     |                  | Ref                                        |                  | Ref                     |                  | Ref                                       |      | Ref                   |      |
| Medium (7–8)                                       | 1.22 (0.97–1.55)            | 0.09         | 1.26 (0.99–1.61)        | 0.06             | <b>1.54 (1.08–2.21)</b>                    | <b>0.02</b>      | <b>1.54 (1.06–2.24)</b> | <b>0.02</b>      | 1.02 (0.74–1.40)                          | 0.90 | 1.00 (0.72–1.39)      | 1.00 |
| High (9–13)                                        | <b>1.60 (1.20–2.15)</b>     | <b>0.002</b> | <b>1.74 (1.28–2.37)</b> | <b>&lt;0.001</b> | <b>3.05 (1.88–4.95)</b>                    | <b>&lt;0.001</b> | <b>3.25 (1.96–5.40)</b> | <b>&lt;0.001</b> | 1.02 (0.69–1.49)                          | 0.94 | 1.03 (0.68–1.54)      | 0.68 |

272 <sup>a</sup> Adjusted for school areas, age, gender, residence, only-child status, boarding school, average monthly living expenses, parental education level

273 <sup>b</sup> Adjusted for age, gender, residence, only-child status, boarding school, average monthly living expenses, parental education level

274 <sup>c</sup> Includes physical activity before or after school or on weekends, physical activity at school, sleep duration on weekdays and weekends, screen time on weekdays and weekends, the consumption frequency of SSBs, breakfast, lunch, dinner, vegetables, fruit, milk and milk alternatives, and the quantity of water and egg consumption

276 Results in bold are statistically significant (p < 0.05)

1  
2  
3  
4 277 **DISCUSSION**

5  
6 278 Lifestyle behaviors of high school students appear to be associated with academic grades, and the  
7  
8  
9 279 cumulative associations between multiple healthy lifestyle behaviors and their academic outcomes  
10  
11 280 seem to be stronger than the independent associations. These findings are particularly applicable to  
12  
13  
14 281 IUHSSs. Lifestyle behaviors are closely related to education, the findings in this study revealed that  
15  
16  
17 282 multiple healthy lifestyle behaviors of high school students may be positively associated with their  
18  
19 283 academic achievement.

20  
21  
22 284 Previous studies reported that meeting the recommendation of sleep duration was positively  
23  
24 285 associated with the academic grades of children and adolescents.<sup>14 15</sup> Sleep is thought to play a  
25  
26  
27 286 crucial and specific role in memory consolidation, and lack of sleep was linked to increased fatigue  
28  
29  
30 287 and sleepiness, and poor attention and cognition.<sup>38 39</sup> However, the association between sleep  
31  
32 288 duration and academic grades among IUHSSs and PUHSSs was inconsistent in this study. Among  
33  
34  
35 289 PUHSSs, meeting the recommendation for sleep duration on weekends had a positive association  
36  
37  
38 290 with students' academic grades. By contrast, a negative association was found between adhering to  
39  
40  
41 291 the recommended sleep duration on weekdays and academic grades among IUHSSs. Outstanding  
42  
43 292 teachers in inner urban schools account for approximately two-thirds of all teachers in Chongqing  
44  
45 293 due to regional and economic development.<sup>40</sup> Inner urban high schools may have stricter rules and  
46  
47  
48 294 tighter schedules compared with peri-urban high schools, and insufficient sleep may be common  
49  
50  
51 295 among IUHSSs. The result of this study showed that extremely few IUHSSs (5.2%) had 8 h or more  
52  
53 296 sleep duration on weekdays. We speculated that IUHSSs who slept 8 h or more on weekdays may  
54  
55  
56 297 sleep at other times, such as during class or independent study time, leading to less time spent  
57  
58 298 studying. In addition, IUHSSs with good academic grades may spend more time in learning than  
59  
60

1  
2  
3  
4 299 those with poor academic grades, which could be another possible explanation for the negative  
5  
6 300 association between insufficient sleep time on weekdays and good academic grades among IUHSSs.  
7  
8

9 301 A previous systematic review and meta-analysis indicated that television viewing and video  
10  
11 302 game playing were negatively associated with academic outcomes, while overall screen time  
12  
13 303 (including watching television, playing electronic games, receiving electronic news and study  
14  
15 304 materials, and using social networking sites) was not associated with academic outcomes among  
16  
17 305 children and adolescents aged 4 to 18 years.<sup>16</sup> The screen time surveyed in this study was overall  
18  
19 306 screen time. The results revealed that meeting the recommendation for screen time on weekdays  
20  
21 307 had a positive association with academic grades, and the association between weekend screen time  
22  
23 308 and academic performance was statistically insignificant among IUHSSs. One possible explanation  
24  
25 309 could be that Chinese high school students are not allowed to use electronic devices on weekdays  
26  
27 310 owing to the strict regulations, but they may use electronic devices in “cram schools” on weekends  
28  
29 311 for receiving electronic news and study materials that may neutralize the negative association  
30  
31 312 between screen-based behaviors and academic grades. No association between screen time and  
32  
33 313 academic grades was found among PUHSSs. The reason could be that students from inner urban  
34  
35 314 areas may have greater access to screen devices and would be more likely to engage in screen-based  
36  
37 315 behaviors compared with those from peri-urban high schools.  
38  
39  
40  
41  
42  
43  
44  
45  
46  
47

48 316 The results in the present study showed increased odds of high academic grades among  
49  
50 317 PUHSSs who had regular dinner consumption, and no association was observed between breakfast,  
51  
52 318 lunch consumption and academic grades. Few studies have explored the relationship between a  
53  
54 319 regular meal pattern throughout the day and academic grades. Many previous studies showed the  
55  
56 320 positive effects of regular breakfast consumption on students’ academic grades, and most of them  
57  
58  
59  
60

1  
2  
3  
4 321 focused on young students.<sup>2 7 41</sup> A study reported that a regular intake of breakfast and lunch was  
5  
6 322 more crucial in grades 5 and 8 students compared with grade 11, whereas a regular intake of dinner  
7  
8  
9 323 was more likely related to academic achievement in grade 11 students compared with grade 5 and  
10  
11 324 grade 8 students.<sup>42</sup> In the present study, eating breakfast, lunch, and dinner five times or less per  
12  
13  
14 325 week accounted for 16.8%, 3.8% and 20.9%, respectively. The frequency of eating dinner five times  
15  
16  
17 326 or less per week accounted for the highest proportion, possibly because the heavy schoolwork  
18  
19 327 resulting in insufficient time for dinner or skipping dinner was served as a weight control measure  
20  
21  
22 328 among high school students. However, Chinese high school students were required to attend evening  
23  
24 329 classes lasting for several hours,<sup>43</sup> and skipping dinner may affect the learning efficiency of evening  
25  
26  
27 330 classes, which may have an important effect on students' academic grades. This could be the reason  
28  
29 331 that eating dinner regularly is positively correlated with academic grades. Health education related  
30  
31 332 to regular meal patterns throughout the day must be conducted among high school students,  
32  
33 333 particularly emphasizing the importance of eating dinner. In IUHSSs and PUHSSs, high frequency  
34  
35 334 of SSBs consumption was unlikely to obtain high academic grades. Additionally, among IUHSSs,  
36  
37 335 meeting the recommendations for egg consumption and high frequency of fruit consumption had  
38  
39 336 significant associations with high academic grades. These results were largely similar to previous  
40  
41 337 studies,<sup>9 23 44</sup> which demonstrated that healthy dietary behaviors, such as frequent fruit consumption,  
42  
43 338 were associated with high academic performance, whereas unhealthy dietary behaviors, including  
44  
45 339 high frequency of SSBs consumption, were associated with poor academic performance.  
46  
47  
48  
49  
50  
51

52  
53 340 In this study, no association was found between physical activity before or after school or on  
54  
55 341 weekends, physical activity at school, and academic grades in IUHSSs and PUHSSs. Most  
56  
57 342 laboratory trials, cohort-based or cross-sectional studies have demonstrated the positive effect of  
58  
59  
60

1  
2  
3  
4 343 physical activity on cognitive function,<sup>45-48</sup> while, studies on physical activity and academic grades  
5  
6 344 have produced mixed results.<sup>49 50</sup> A previous study found an inverse U-shaped curvilinear  
7  
8  
9 345 association between physical activity and academic achievement, thereby indicating that too little  
10  
11 346 physical activity might impair the positive effects of physical activity on students' cognitive  
12  
13  
14 347 function and top sports students may have additional extracurricular physical activity that displaced  
15  
16  
17 348 the time spent on academics.<sup>51</sup> Moreover, under the social, cultural, and educational background of  
18  
19 349 China, many schools have reduced the physical education curriculum to maximize the study time  
20  
21  
22 350 on subjects important for exams.<sup>18</sup> This phenomenon is particularly prominent in high schools, as  
23  
24  
25 351 high school students need to prepare for the National College Entrance Examination.<sup>1</sup> The results  
26  
27 352 of this study showed that only 5.6% of the students before or after school or on weekends, and  
28  
29  
30 353 19.5% of the students at school have more than 1 hour of physical activity. Considering these factors,  
31  
32  
33 354 the cut-off values of the recommendation for physical activity may be inappropriate to assess the  
34  
35  
36 355 association between physical activity and academic grades of high school students, and this could  
37  
38 356 be the reason for the lack of significant association between physical activity and academic grades  
39  
40  
41 357 in IUHSSs and PUHSSs. This was also mentioned in a previous study targeting the association  
42  
43 358 between physical activity and academic achievement among elementary school students.<sup>23</sup> In  
44  
45  
46 359 addition, the questionnaire used for assessing the level of physical activity was not evaluated for its  
47  
48  
49 360 reliability and validity, the limited information provided by the questionnaire could be another  
50  
51  
52 361 reason for the lack of association. Choosing the appropriate method to assess the physical activity  
53  
54  
55 362 of high school students still needs to be explored in future studies, thereby to better explore its  
56  
57  
58 363 association with academic performance.

59 364 The findings demonstrated that the combined associations of multiple lifestyle behaviors  
60

1  
2  
3  
4 365 resulted in a substantially higher likelihood of obtaining academic grades than the independent  
5  
6 366 associations among IUHSSs, which was similar to the results of previous studies that investigated  
7  
8  
9 367 the combined effects of meeting recommendations for diet, physical activity, screen time and sleep  
10  
11 368 on academic achievement of primary school students.<sup>22 23</sup> Overall, one possible explanation for the  
12  
13  
14 369 positive association between multiple lifestyle behaviors and academic grades is that high school  
15  
16  
17 370 students with good academic grades usually have better self-control, which could contribute to high  
18  
19 371 adherence to a healthy lifestyle. The present study complements and extends these important  
20  
21  
22 372 findings in high school students. Given the importance of academic grades for high school students,  
23  
24  
25 373 this study could provide valuable references for health promotion initiatives that lead to  
26  
27 374 improvement in academic grades. Interventions aiming to improve multiple lifestyle behaviors may  
28  
29  
30 375 have a greater positive effect on the academic grades of high school students than those focusing on  
31  
32  
33 376 a single lifestyle behavior.

34  
35 377 Regarding the potential mechanisms on the associations between lifestyle behaviors and  
36  
37 378 academic grades, a previous study showed that adolescence is a critical period in which there is  
38  
39  
40 379 considerable re-organisation and growth of many brain structures, including the hippocampus  
41  
42  
43 380 related to learning and memory.<sup>52</sup> Increasingly evidence demonstrates that the hippocampus is  
44  
45  
46 381 particularly responsive to the lifestyle influences during adolescence, previous studies showed that  
47  
48 382 unhealthy diet and decreased exercise levels have been associated with decreased hippocampal  
49  
50  
51 383 neurogenesis and cognitive performance in rodent models.<sup>53-55</sup> And the BDNF (brain-derived  
52  
53 384 neurotrophic factor) system appears to be a major mechanism underlying the effects of exercise and  
54  
55  
56 385 diet on neurogenesis and cognitive function.<sup>52 56</sup>

57  
58 386 This study has certain limitations. Firstly, the use of cross-sectional survey data reduces the  
59  
60

1  
2  
3  
4 387 researchers' ability to make direct causal inferences. Future longitudinal studies should be  
5  
6  
7 388 conducted to confirm the findings of the present study. Secondly, lifestyle behaviors and academic  
8  
9 389 grades were obtained by self-report that may introduce bias caused by self-enhancement and  
10  
11 390 measurement flaws. Thirdly, academic grades in this study is a comprehensive ranking of all  
12  
13  
14 391 compulsory subjects, however, students' lifestyle behaviors could have different influences on  
15  
16  
17 392 different subjects,<sup>23</sup> the independent and combined associations between multiple lifestyle behaviors  
18  
19 393 and academic grades among Chinese high school students could be explored in further studies  
20  
21  
22 394 according to the classification of students (science or liberal students), as well as the classification  
23  
24  
25 395 of subjects (Chinese, English, mathematics, physics, chemistry, biology, geography, history or  
26  
27 396 politics). Fourthly, being an exploratory study, questions on physical activity, sleep duration, and  
28  
29  
30 397 screen time were adapted from the China Health and Nutrition Survey,<sup>57</sup> and questions on dietary  
31  
32 398 behaviors were adapted from Chinese Dietary Guideline 2016.<sup>34</sup> Additionally, expert review and a  
33  
34  
35 399 pilot study were done before implementation. However, the questionnaire was not evaluated for its  
36  
37  
38 400 reliability and validity, and the unvalidated measures in the questionnaire designed to measure the  
39  
40  
41 401 lifestyle behaviors and academic grades may raise potential issues related to reliability. Further  
42  
43 402 studies should consider using a verified questionnaire or validating the questionnaire before  
44  
45  
46 403 administration. Fifthly, the participants who were investigated in this study could only reflect the  
47  
48 404 situation of high school students in Chongqing to a certain extent, and cannot be generalizable to all  
49  
50  
51 405 high school students across China. Further nationally representative studies are warranted.

## 406 **CONCLUSIONS**

407 This study demonstrated that there is a correlation between the lifestyle behaviors of high school  
408 students and academic grades, and cumulative associations between multiple healthy lifestyle



1  
2  
3  
4 409 behaviors and academic grades appear to be stronger than the independent associations. These  
5  
6 410 findings are particularly applicable to IUHSSs. The importance of multiple healthy lifestyle  
7  
8  
9 411 behaviors for the academic grades of high school students should be considered by public health  
10  
11 412 decision-makers and school principals or management bodies in the high school settings.

#### 14 413 **Abbreviations**

16  
17 414 IUHSSs: inner urban high school students; PUHSSs: peri-urban high school students; SSBs: sugar-  
18  
19 415 sweetened beverages; SPSS: Statistical Package for Social Sciences; OR: odds ratios; CI:  
20  
21 416 confidence intervals.

#### 24 417 **Ethics approval and consent to participate**

26  
27 418 This study was reviewed and approved by the Ethics Committee of Chongqing Medical University  
28  
29 419 (record number 2016001). Informed consent was obtained from all participants, and they could  
30  
31 420 voluntarily participate or withdraw from the study at any stage.

#### 34 421 **Availability of data and materials**

36  
37 422 The datasets used and/or analyzed during the current study are available from the corresponding  
38  
39 423 author on reasonable request.

#### 42 424 **Competing interests**

44  
45 425 The authors declare that they have no competing interests.

#### 47 426 **Funding**

49  
50 427 This study was funded by the Postgraduate Scientific Research and Innovation Project of Chongqing,  
51  
52 428 grant number CYS19208.

#### 53 429 **Authors' Contributions**

55  
56 430 ZC carried out investigation, data analysis and wrote the paper. JX, HZ, HP provided help with the  
57  
58  
59  
60

1  
2  
3  
4 431 investigation and data collection. JX, AC, ZZ, SM provided the assistance in reviewing the paper.

5  
6 432 YZ provided guidance in study design, organized the investigation, and is the corresponding author.

7  
8  
9 433 All authors approved the final manuscript.

10  
11 434 **Acknowledgments**

12  
13  
14 435 We would like to thank the support of the Postgraduate Scientific Research and Innovation Project

15  
16 436 of Chongqing (CYS19208). Also, we would like to thank all the teachers and class leaders who

17  
18 437 helped us coordinate the survey. We thank all the participants for their support of this project. We

19  
20 438 also would like to acknowledge all the investigators who participated in the survey.

21  
22  
23 439 **References**

24  
25  
26 440 1. Kirkpatrick R, Zang YB. The Negative Influences of Exam-Oriented Education on Chinese High  
27 441 School Students: Backwash from Classroom to Child. *Language Testing in Asia* 2011;1(3):36.

28  
29 442 2. Yao J, Liu Y, Zhou S. Effect of Eating Breakfast on Cognitive Development of Elementary and Middle  
30 443 School Students: An Empirical Study Using Large-Scale Provincial Survey Data. *Medical science*  
31 444 *monitor : international medical journal of experimental and clinical research* 2019;25:8843-53.

32  
33 445 3. Chen WL, Chen JH. Consequences of inadequate sleep during the college years: Sleep deprivation,  
34 446 grade point average, and college graduation. *Prev Med* 2019;124:23-28.

35  
36 447 4. Stea TH, Torstveit MK. Association of lifestyle habits and academic achievement in Norwegian  
37 448 adolescents: a cross-sectional study. *BMC Public Health* 2014;14:829.

38  
39 449 5. Scott SP, De Souza MJ, Koehler K, et al. Combined Iron Deficiency and Low Aerobic Fitness Doubly  
40 450 Burden Academic Performance among Women Attending University. *The Journal of nutrition*  
41 451 2017;147(1):104-09.

42  
43 452 6. Burrows T, Goldman S, Pursey K, et al. Is there an association between dietary intake and academic  
44 453 achievement: a systematic review. *J Hum Nutr Diet* 2017;30(2):117-40.

45  
46 454 7. Ptomey LT, Steger FL, Schubert MM, et al. Breakfast Intake and Composition Is Associated with  
47 455 Superior Academic Achievement in Elementary Schoolchildren. *J Am Coll Nutr* 2016;35(4):326-33.

48  
49 456 8. Kooshki A, Mohammadi M, Rivandi M. Nutritional intake and its association with educational  
50 457 achievement in high-school students in Islamic Republic of Iran. *East Mediterr Health J*  
51 458 2018;24(6):532-37.

52  
53 459 9. Burrows T, Goldman S, Olson RK, et al. Associations between selected dietary behaviours and  
460 460 academic achievement: A study of Australian school aged children. *Appetite* 2017;116:372-80.

54  
55 461 10. Hotting K, Roder B. Beneficial effects of physical exercise on neuroplasticity and cognition.  
56 462 *Neuroscience and biobehavioral reviews* 2013;37(9 Pt B):2243-57.

57  
58 463 11. Edwards JU, Mauch L, Winkelman MR. Relationship of nutrition and physical activity behaviors  
59 464 and fitness measures to academic performance for sixth graders in a midwest city school district. *J*  
60 465 *Sch Health* 2011;81(2):65-73.

- 1  
2  
3 466 12. Resaland GK, Aadland E, Moe VF, et al. Effects of physical activity on schoolchildren's academic  
4 467 performance: The Active Smarter Kids (ASK) cluster-randomized controlled trial. *Prev Med*  
5 468 2016;91:322-28.
- 6 469 13. Singh AS, Saliassi E, van den Berg V, et al. Effects of physical activity interventions on cognitive and  
7 470 academic performance in children and adolescents: a novel combination of a systematic review and  
8 471 recommendations from an expert panel. *British journal of sports medicine* 2019;53(10):640-47.
- 9 472 14. Hysing M, Harvey AG, Linton SJ, et al. Sleep and academic performance in later adolescence: results  
10 473 from a large population-based study. *Journal of sleep research* 2016;25(3):318-24.
- 11 474 15. Wolfson AR, Carskadon MA. Understanding adolescents' sleep patterns and school performance: a  
12 475 critical appraisal. *Sleep medicine reviews* 2003;7(6):491-506.
- 13 476 16. Adelantado-Renau M, Moliner-Urdiales D, Cavero-Redondo I, et al. Association Between Screen  
14 477 Media Use and Academic Performance Among Children and Adolescents: A Systematic Review and  
15 478 Meta-analysis. *JAMA pediatrics* 2019
- 16 479 17. Yan H, Zhang R, Oniffrey TM, et al. Associations among Screen Time and Unhealthy Behaviors,  
17 480 Academic Performance, and Well-Being in Chinese Adolescents. *Int J Environ Res Public Health*  
18 481 2017;14(6)
- 19 482 18. Zhang Y, Zhang D, Jiang Y, et al. Association between physical activity and teacher-reported  
20 483 academic performance among fifth-graders in Shanghai: a quantile regression. *PLoS One*  
21 484 2015;10(3):e0115483.
- 22 485 19. Martínez-Gómez D, Veiga OL, Gómez-Martínez S, et al. Gender-specific influence of health  
23 486 behaviors on academic performance in Spanish adolescents: the AFINOS study. *Nutricion*  
24 487 *hospitalaria* 2012;27(3):724-30.
- 25 488 20. Bradley BJ, Greene AC. Do health and education agencies in the United States share responsibility  
26 489 for academic achievement and health? A review of 25 years of evidence about the relationship of  
27 490 adolescents' academic achievement and health behaviors. *The Journal of adolescent health : official*  
28 491 *publication of the Society for Adolescent Medicine* 2013;52(5):523-32.
- 29 492 21. Kamath CC, Vickers KS, Ehrlich A, et al. Clinical review: behavioral interventions to prevent  
30 493 childhood obesity: a systematic review and metaanalyses of randomized trials. *The Journal of*  
31 494 *clinical endocrinology and metabolism* 2008;93(12):4606-15.
- 32 495 22. Ickovics JR, Carroll-Scott A, Peters SM, et al. Health and academic achievement: cumulative effects  
33 496 of health assets on standardized test scores among urban youth in the United States. *J Sch Health*  
34 497 2014;84(1):40-8.
- 35 498 23. Faught EL, Ekwaru JP, Gleddie D, et al. The combined impact of diet, physical activity, sleep and  
36 499 screen time on academic achievement: a prospective study of elementary school students in Nova  
37 500 Scotia, Canada. *Int J Behav Nutr Phys Act* 2017;14(1):29.
- 38 501 24. Chortatos A, Terragni L, Henjum S, et al. Consumption habits of school canteen and non-canteen  
39 502 users among Norwegian young adolescents: a mixed method analysis. *BMC pediatrics*  
40 503 2018;18(1):328-28.
- 41 504 25. Ragelienė T, Grønhøj A. The influence of peers' and siblings' on children's and adolescents' healthy  
42 505 eating behavior. A systematic literature review. *Appetite* 2020;148:104592.
- 43 506 26. Li D. The study about the grade and Psychological health of the boarders and day students—For  
44 507 example Shandong Experimental High School. Shandong Normal University, 2007.
- 45 508 27. Pan XD, Guan NN. Analysis of the Relationship between Mental Health Status and Academic  
46 509 Performance of Medical Students. *Medical Education Research and Practice* 2019

- 1  
2  
3 510 28. Haddad MR, Sarti FM. Sociodemographic determinants of health behaviors among Brazilian  
4 511 adolescents: Trends in physical activity and food consumption, 2009-2015. *Appetite*  
5 512 2020;144:104454.  
6  
7 513 29. Zhao P. Too complex to be managed? New trends in peri-urbanisation and its planning in Beijing.  
8 514 *Cities* 2013;30:68-76.  
9  
10 515 30. Run J, Sun Q. The Spatio-temporal Evolution of the County Economic Disparity in Chongqing City  
11 516 Since Its Municipality. *Journal of Southwest University (Natural Science Edition)* 2020;42(8):106-  
12 517 16.  
13  
14 518 31. Shrewsbury VA, Foley BC, Flood VM, et al. School-Level Socioeconomic Status Influences  
15 519 Adolescents' Health-Related Lifestyle Behaviors and Intentions. *J Sch Health* 2018;88(8):583-89.  
16  
17 520 32. Yan H, Zhang R, Oniffrey TM, et al. Associations among Screen Time and Unhealthy Behaviors,  
18 521 Academic Performance, and Well-Being in Chinese Adolescents. *International journal of*  
19 522 *environmental research and public health* 2017;14(6):596.  
20  
21 523 33. National Children's Medical Center; Shanghai Children's Medical Center; Shanghai Institute of  
22 524 Physical Education; Clinical Guidelines Development and Evaluation Center of Children's Hospital  
23 525 of Fudan University. Physical Activity Guidelines for Chinese Children and Adolescents. Shanghai,  
24 526 China, 2018.  
25 527 <http://www.shanghai.gov.cn/nw2/nw2314/nw2315/nw17239/nw17240/u21aw1286214.html>.  
26 528 Accessed 6 August 2020.  
27  
28 529 34. Chinese Nutrition Society. Dietary Guidelines for Chinese School-age Children 2016; People's  
29 530 Medical Publishing House: Beijing, China, 2016.  
30 531 <http://dg.cnsoc.org/article/04/8a2389fd575f695101577a545b0102db.html>. Accessed 3 August  
31 532 2020.  
32  
33 533 35. Azeredo CM, de Rezende LF, Canella DS, et al. Dietary intake of Brazilian adolescents. *Public*  
34 534 *Health Nutr* 2015;18(7):1215-24.  
35  
36 535 36. Guthold R, Stevens GA, Riley LM, et al. Global trends in insufficient physical activity among  
37 536 adolescents: a pooled analysis of 298 population-based surveys with 1.6 million participants. *The*  
38 537 *Lancet Child & adolescent health* 2020;4(1):23-35.  
39  
40 538 37. Chen X, Wang Y. Is ideal body image related to obesity and lifestyle behaviours in African American  
41 539 adolescents? *Child: care, health and development* 2012;38(2):219-28.  
42  
43 540 38. Lim J, Dinges DF. A meta-analysis of the impact of short-term sleep deprivation on cognitive  
44 541 variables. *Psychological bulletin* 2010;136(3):375-89.  
45  
46 542 39. Rasch B, Born J. About sleep's role in memory. *Physiological reviews* 2013;93(2):681-766.  
47 543  
48 544 40. Chongqing People's Congress. Suggestions on Expansion of High-quality Education Resources in  
49 545 Inner Urban Cities to Peri-urban Cities. 2017.  
50 546 <http://www.ccpc.cq.cn/home/index/more/id/208369.html>. Accessed 14 November 2020.  
51 547  
52 548 41. Littlecott HJ, Moore GF, Moore L, et al. Association between breakfast consumption and educational  
53 549 outcomes in 9-11-year-old children. *Public Health Nutr* 2016;19(9):1575-82.  
54  
55 550 42. Kim HY, Frongillo EA, Han SS, et al. Academic performance of Korean children is associated with  
56 551 dietary behaviours and physical status. *Asia Pacific journal of clinical nutrition* 2003;12(2):186-92.  
57  
58 552 43. Liu X, Zhao Z, Jia C, et al. Sleep patterns and problems among chinese adolescents. *Pediatrics*  
59 553 2008;121(6):1165-73.  
60  
61 554 44. Dumuid D, Olds T, Martin-Fernandez JA, et al. Academic Performance and Lifestyle Behaviors in  
62 555 Australian School Children: A Cluster Analysis. *Health Educ Behav* 2017;44(6):918-27.

- 1  
2  
3 554 45. Donnelly JE, Hillman CH, Castelli D, et al. Physical Activity, Fitness, Cognitive Function, and  
4 555 Academic Achievement in Children: A Systematic Review. *Medicine and science in sports and*  
5 556 *exercise* 2016;48(6):1223-4.  
6  
7 557 46. Krafft CE, Schaeffer DJ, Schwarz NF, et al. Improved frontoparietal white matter integrity in  
8 558 overweight children is associated with attendance at an after-school exercise program.  
9 559 *Developmental neuroscience* 2014;36(1):1-9.  
10  
11 560 47. Chaddock L, Hillman CH, Pontifex MB, et al. Childhood aerobic fitness predicts cognitive  
12 561 performance one year later. *Journal of sports sciences* 2012;30(5):421-30.  
13  
14 562 48. Walsh JJ, Barnes JD, Cameron JD, et al. Associations between 24 hour movement behaviours and  
15 563 global cognition in US children: a cross-sectional observational study. *The Lancet Child &*  
16 564 *adolescent health* 2018;2(11):783-91.  
17  
18 565 49. Hollar D, Messiah SE, Lopez-Mitnik G, et al. Effect of a two-year obesity prevention intervention  
19 566 on percentile changes in body mass index and academic performance in low-income elementary  
20 567 school children. *American journal of public health* 2010;100(4):646-53.  
21  
22 568 50. Donnelly JE, Hillman CH, Greene JL, et al. Physical activity and academic achievement across the  
23 569 curriculum: Results from a 3-year cluster-randomized trial. *Preventive Medicine* 2017;99:140-45.  
24  
25 570 51. Syvaioja HJ, Kantomaa MT, Ahonen T, et al. Physical activity, sedentary behavior, and academic  
26 571 performance in Finnish children. *Medicine and science in sports and exercise* 2013;45(11):2098-104.  
27  
28 572 52. Hueston CM, Cryan JF, Nolan YM. Stress and adolescent hippocampal neurogenesis: diet and  
29 573 exercise as cognitive modulators. *Translational psychiatry* 2017;7(4):e1081.  
30  
31 574 53. Opendak M, Gould E. Adult neurogenesis: a substrate for experience-dependent change. *Trends in*  
32 575 *cognitive sciences* 2015;19(3):151-61.  
33  
34 576 54. Boitard C, Etchamendy N, Sauvant J, et al. Juvenile, but not adult exposure to high-fat diet impairs  
35 577 relational memory and hippocampal neurogenesis in mice. *Hippocampus* 2012;22(11):2095-100.  
36  
37 578 55. van Praag H. Neurogenesis and exercise: past and future directions. *Neuromolecular medicine*  
38 579 2008;10(2):128-40.  
39  
40 580 56. Bekinschtein P, Oomen CA, Saksida LM, et al. Effects of environmental enrichment and voluntary  
41 581 exercise on neurogenesis, learning and memory, and pattern separation: BDNF as a critical variable?  
42 582 *Seminars in cell & developmental biology* 2011;22(5):536-42.  
43  
44 583 57. China Health and Nutrition Survey. <https://www.cpc.unc.edu/projects/china>. Accessed 3 April 2020.  
45  
46  
47  
48  
49  
50  
51  
52  
53  
54  
55  
56  
57  
58  
59  
60 584

**Supplementary Table 1.** Description of questions in terms of lifestyle behaviors

| Variable          | Questions description                                                                                                                                                                                                                                                                                                                                                  |
|-------------------|------------------------------------------------------------------------------------------------------------------------------------------------------------------------------------------------------------------------------------------------------------------------------------------------------------------------------------------------------------------------|
| Physical activity | 1) Do you participate in any physical exercises including relatively intense physical exercises, such as volleyball, soccer, and badminton before or after school or on weekends each week? If “yes”, how many times do you participate in any physical exercises? On average, for how long do you participate in these physical exercises each time? (hours: minutes) |
|                   | 2) Do you participate in any physical exercises including relatively intense physical exercises, such as volleyball, soccer, and badminton at school each week? If “yes”, how many times do you participate in any physical exercises? On average, for how long do you participate in these physical exercises each time? (hours: minutes)                             |
| Sleep duration    | 1) How many hours each day do you usually sleep including daytime and night-time on weekdays (hours: minutes)?                                                                                                                                                                                                                                                         |
|                   | 2) How many hours each day do you usually sleep including daytime and night-time on weekends (hours: minutes)?                                                                                                                                                                                                                                                         |
| Screen time       | 1) On average, how long is your daily screen time, such as watching TV, online videos, using a computer or smart-phone, playing video games on weekdays (hours: minutes)?                                                                                                                                                                                              |
|                   | 2) On average, how long is your daily screen time, such as watching TV, online videos, using a computer or smart-phone, playing video games on weekends (hours: minutes)?                                                                                                                                                                                              |
| Dietary behaviors | 1) How often do you drink sugar-sweetened beverages? Response options were “every day”, “5–6 times/week”, “3–4 times/week”, “1–2 times/week”, “1–3 times/month”, “<once/month”.                                                                                                                                                                                        |
|                   | 2) How often do you have breakfast? Response options were “every day”, “5–6 times/week”, “3–4 times/week”, “1–2 times/month”, “never”.                                                                                                                                                                                                                                 |
|                   | 3) How often do you have lunch? Response options were “every day”, “5–6 times/week”, “3–4 times/week”, “1–2 times/month”, “never”.                                                                                                                                                                                                                                     |

1  
2  
3  
4 4) How often do you have dinner? Response options were “every day”, “5–6  
5 times/week”, “3–4 times/week”, “1–2 times/month”, “never”.

6  
7  
8 5) How often do you eat vegetable? Response options were “>once/day”, “4–6  
9 times/week”, “2–3 times/week”, “once/week”, “<once/week”.

10  
11  
12 6) How often do you eat fruit? Response options were “>once/day”, “4–6  
13 times/week”, “2–3 times/week”, “once/week”, “<once/week”.

14  
15  
16 7) How often do you drink milk and alternatives? Response options were  
17 “>once/day”, “4–6 times/week”, “2–3 times/week”, “once/week”, “<once/week”.

18  
19  
20 8) On average, how much is your daily water intake? Response options were  
21 “<800 milliliter”, “800–1100 milliliter”, “1100–1400 milliliter”, “1400–1500  
22 milliliter”, “1500–1700 milliliter”.

23  
24  
25 9) On average, how many eggs do you eat every day? Response options were  
26 “three or more per day”, “two per day”, “one per day”, “3–4/week”, “1–2/week”,  
27 “never”.  
28  
29

---

STROBE Statement—Checklist of items that should be included in reports of *cross-sectional studies*

|                              | Item No | Recommendation                                                                                                                                                                                    | Page No |
|------------------------------|---------|---------------------------------------------------------------------------------------------------------------------------------------------------------------------------------------------------|---------|
| <b>Title and abstract</b>    | 1       | (a) Indicate the study's design with a commonly used term in the title or the abstract                                                                                                            | 1-2     |
|                              |         | (b) Provide in the abstract an informative and balanced summary of what was done and what was found                                                                                               | 2-3     |
| <b>Introduction</b>          |         |                                                                                                                                                                                                   |         |
| Background/rationale         | 2       | Explain the scientific background and rationale for the investigation being reported                                                                                                              | 4-7     |
| Objectives                   | 3       | State specific objectives, including any prespecified hypotheses                                                                                                                                  | 5-7     |
| <b>Methods</b>               |         |                                                                                                                                                                                                   |         |
| Study design                 | 4       | Present key elements of study design early in the paper                                                                                                                                           | 7       |
| Setting                      | 5       | Describe the setting, locations, and relevant dates, including periods of recruitment, exposure, follow-up, and data collection                                                                   | 7       |
| Participants                 | 6       | (a) Give the eligibility criteria, and the sources and methods of selection of participants                                                                                                       | 7       |
| Variables                    | 7       | Clearly define all outcomes, exposures, predictors, potential confounders, and effect modifiers. Give diagnostic criteria, if applicable                                                          | 8-10    |
| Data sources/<br>measurement | 8*      | For each variable of interest, give sources of data and details of methods of assessment (measurement). Describe comparability of assessment methods if there is more than one group              | 8-10    |
| Bias                         | 9       | Describe any efforts to address potential sources of bias                                                                                                                                         | 26      |
| Study size                   | 10      | Explain how the study size was arrived at                                                                                                                                                         | 7       |
| Quantitative variables       | 11      | Explain how quantitative variables were handled in the analyses. If applicable, describe which groupings were chosen and why                                                                      | 9-10    |
| Statistical methods          | 12      | (a) Describe all statistical methods, including those used to control for confounding                                                                                                             | 9-10    |
|                              |         | (b) Describe any methods used to examine subgroups and interactions                                                                                                                               |         |
|                              |         | (c) Explain how missing data were addressed                                                                                                                                                       |         |
|                              |         | (d) If applicable, describe analytical methods taking account of sampling strategy                                                                                                                |         |
|                              |         | (e) Describe any sensitivity analyses                                                                                                                                                             |         |
| <b>Results</b>               |         |                                                                                                                                                                                                   |         |
| Participants                 | 13*     | (a) Report numbers of individuals at each stage of study—eg numbers potentially eligible, examined for eligibility, confirmed eligible, included in the study, completing follow-up, and analysed | 10-11   |
|                              |         | (b) Give reasons for non-participation at each stage                                                                                                                                              |         |
|                              |         | (c) Consider use of a flow diagram                                                                                                                                                                |         |
| Descriptive data             | 14*     | (a) Give characteristics of study participants (eg demographic, clinical, social) and information on exposures and potential confounders                                                          | 10-14   |
|                              |         | (b) Indicate number of participants with missing data for each variable of interest                                                                                                               |         |
| Outcome data                 | 15*     | Report numbers of outcome events or summary measures                                                                                                                                              | 10-14   |



|    |                          |    |                                                                                                                                                                                                              |
|----|--------------------------|----|--------------------------------------------------------------------------------------------------------------------------------------------------------------------------------------------------------------|
| 1  |                          |    |                                                                                                                                                                                                              |
| 2  | Main results             | 16 | (a) Give unadjusted estimates and, if applicable, confounder-adjusted estimates and their precision (eg, 95% confidence interval). Make clear which confounders were adjusted for and why they were included |
| 3  |                          |    | 17-20                                                                                                                                                                                                        |
| 4  |                          |    |                                                                                                                                                                                                              |
| 5  |                          |    |                                                                                                                                                                                                              |
| 6  |                          |    |                                                                                                                                                                                                              |
| 7  |                          |    |                                                                                                                                                                                                              |
| 8  |                          |    |                                                                                                                                                                                                              |
| 9  |                          |    |                                                                                                                                                                                                              |
| 10 |                          |    |                                                                                                                                                                                                              |
| 11 | Other analyses           | 17 | Report other analyses done—eg analyses of subgroups and interactions, and sensitivity analyses                                                                                                               |
| 12 |                          |    |                                                                                                                                                                                                              |
| 13 |                          |    |                                                                                                                                                                                                              |
| 14 | <b>Discussion</b>        |    |                                                                                                                                                                                                              |
| 15 | Key results              | 18 | Summarise key results with reference to study objectives                                                                                                                                                     |
| 16 | Limitations              | 19 | Discuss limitations of the study, taking into account sources of potential bias or imprecision. Discuss both direction and magnitude of any potential bias                                                   |
| 17 |                          |    | 26                                                                                                                                                                                                           |
| 18 |                          |    |                                                                                                                                                                                                              |
| 19 |                          |    |                                                                                                                                                                                                              |
| 20 | Interpretation           | 20 | Give a cautious overall interpretation of results considering objectives, limitations, multiplicity of analyses, results from similar studies, and other relevant evidence                                   |
| 21 |                          |    | 21-26                                                                                                                                                                                                        |
| 22 |                          |    |                                                                                                                                                                                                              |
| 23 |                          |    |                                                                                                                                                                                                              |
| 24 | Generalisability         | 21 | Discuss the generalisability (external validity) of the study results                                                                                                                                        |
| 25 |                          |    | 26                                                                                                                                                                                                           |
| 26 | <b>Other information</b> |    |                                                                                                                                                                                                              |
| 27 | Funding                  | 22 | Give the source of funding and the role of the funders for the present study and, if applicable, for the original study on which the present article is based                                                |
| 28 |                          |    | 27                                                                                                                                                                                                           |
| 29 |                          |    |                                                                                                                                                                                                              |
| 30 |                          |    |                                                                                                                                                                                                              |

\*Give information separately for exposed and unexposed groups.

**Note:** An Explanation and Elaboration article discusses each checklist item and gives methodological background and published examples of transparent reporting. The STROBE checklist is best used in conjunction with this article (freely available on the Web sites of PLoS Medicine at <http://www.plosmedicine.org/>, Annals of Internal Medicine at <http://www.annals.org/>, and Epidemiology at <http://www.epidem.com/>). Information on the STROBE Initiative is available at [www.strobe-statement.org](http://www.strobe-statement.org).
